# Supplementary material for: Systematic copolymer screening for foaming experiments supported by computational methods
Source: Royal Society of Chemistry journal article supplement (doi:10.1039/d3ta06062d), 2023-01-01
Supplement: d3ta06062d1.pdf [file d3ta06062d1.pdf]

## Supporting Information

### **Systematic copolymer screening for foaming experiments**

*Patrick Endres, Timo Schuett, Christian Brütting, Julian Kimmig, Rodrigo Q. Albuquerque,  
Tobias Standau, Stefan Zechel, Holger Ruckdäschel\*, Ulrich S. Schubert\**

P. Endres, T. Schuett, J. Kimmig, Dr. S. Zechel, Prof. Dr. U. S. Schubert  
Laboratory of Organic and Macromolecular Chemistry (IOMC)  
Friedrich Schiller University Jena, Humboldtstr. 10, 07743 Jena (Germany)  
E-Mail: [ulrich.schubert@uni-jena.de](mailto:ulrich.schubert@uni-jena.de); [www.schubert-group.de](http://www.schubert-group.de)

P. Endres, T. Schuett, J. Kimmig Dr. S. Zechel, Prof. Dr. U. S. Schubert  
Jena Center for Soft Matter (JCSM)  
Friedrich Schiller University Jena, Philosophenweg 7, 07743 Jena (Germany)

C. Brütting, R. Q. Albuquerque, Dr.-Ing. T. Standau, Prof. Dr.-Ing. H. Ruckdäschel  
Department of Polymer Engineering  
University of Bayreuth, Universitätsstr. 30, 95447 Bayreuth (Germany)  
E-Mail: [Holger.Ruckdaeschel@uni-bayreuth.de](mailto:Holger.Ruckdaeschel@uni-bayreuth.de); [www.polymer-engineering.de](http://www.polymer-engineering.de)

## Table of contents

|                             |           |
|-----------------------------|-----------|
| 1) $^1\text{H}$ NMR spectra | S3 – S20  |
| 2) SEC Elugrams             | S21 – S38 |

**<sup>1</sup>H NMR spectra**

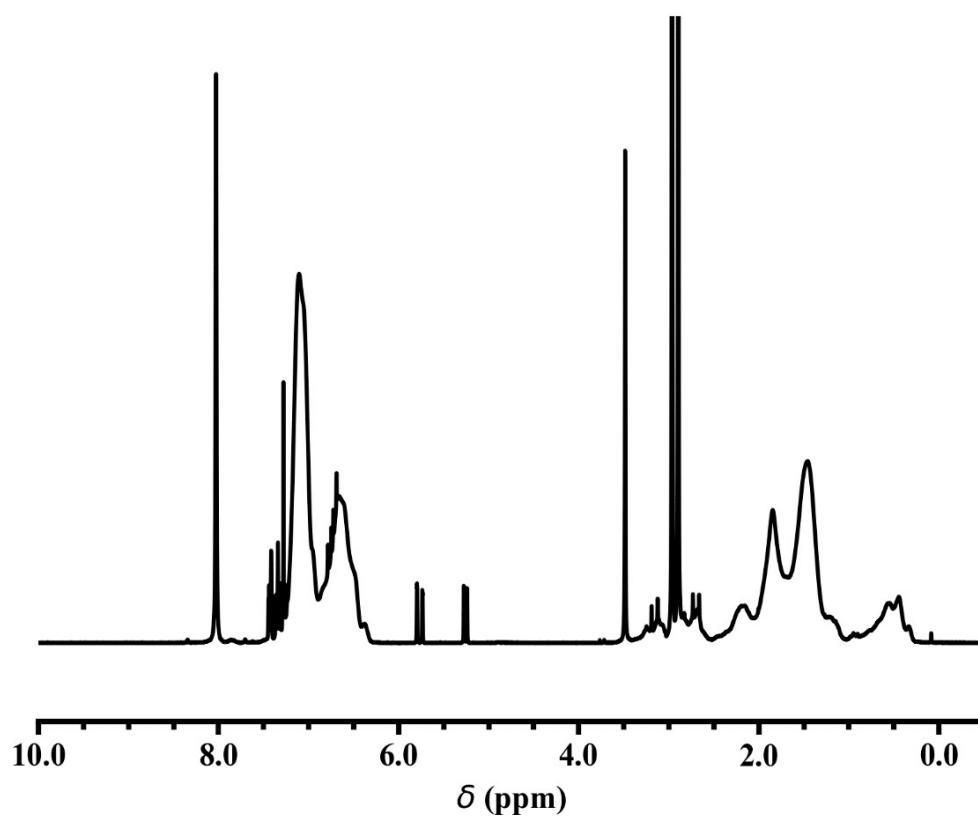

**Figure S1.** <sup>1</sup>H NMR spectrum of polymer **P1** (300 MHz, CDCl<sub>3</sub>).

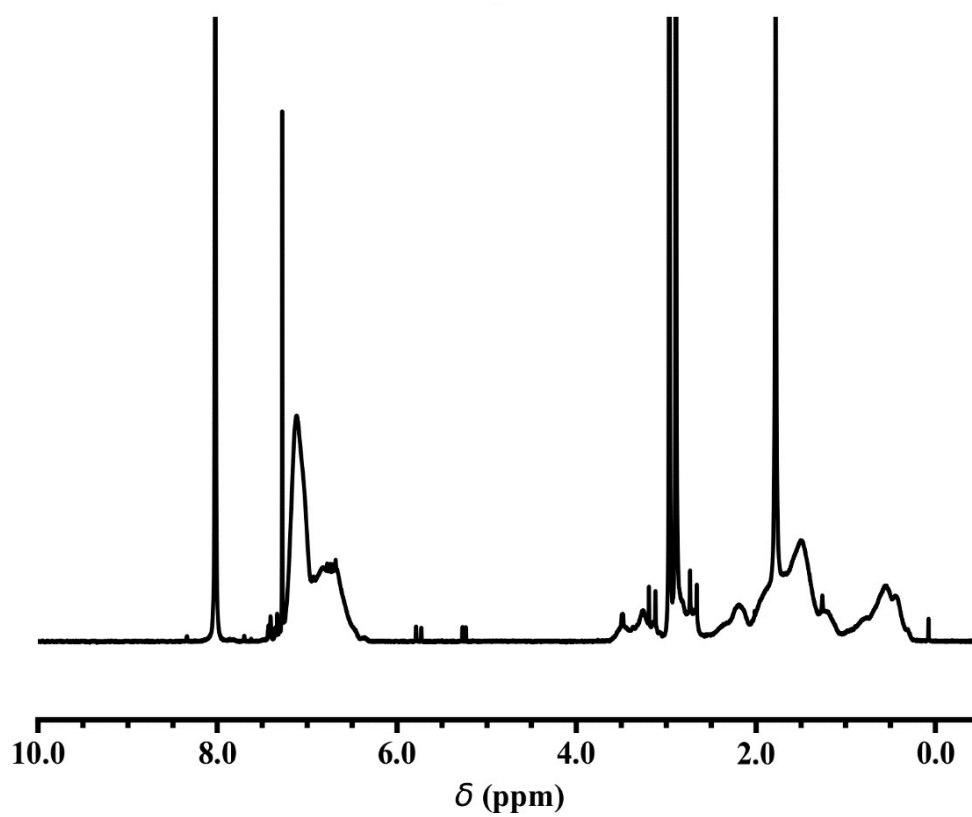

**Figure S2.** <sup>1</sup>H NMR spectrum of polymer **P2** (300 MHz, CDCl<sub>3</sub>).

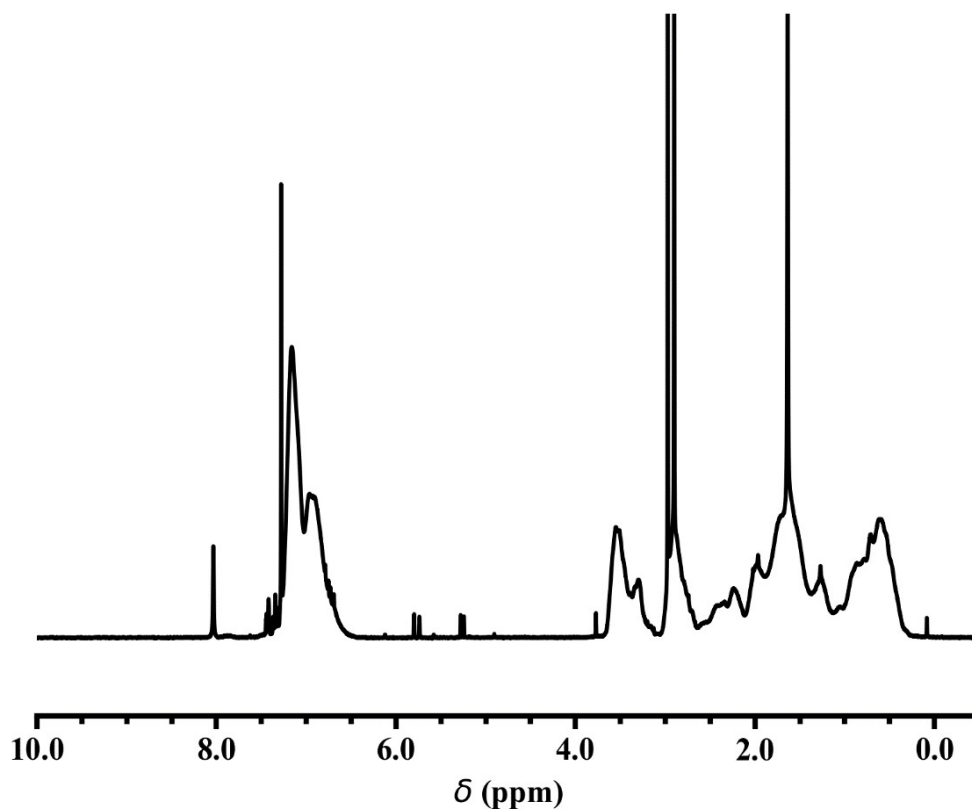

**Figure S3.** <sup>1</sup>H NMR spectrum of polymer P3 (300 MHz, CDCl<sub>3</sub>).

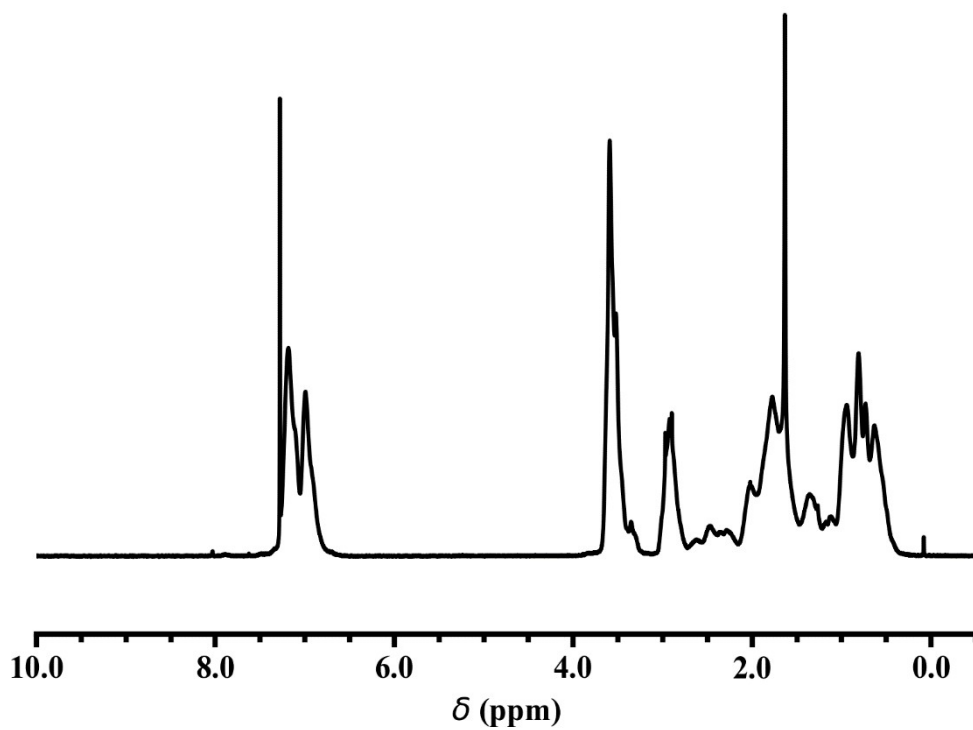

**Figure S4.** <sup>1</sup>H NMR spectrum of polymer P4 (300 MHz, CDCl<sub>3</sub>).

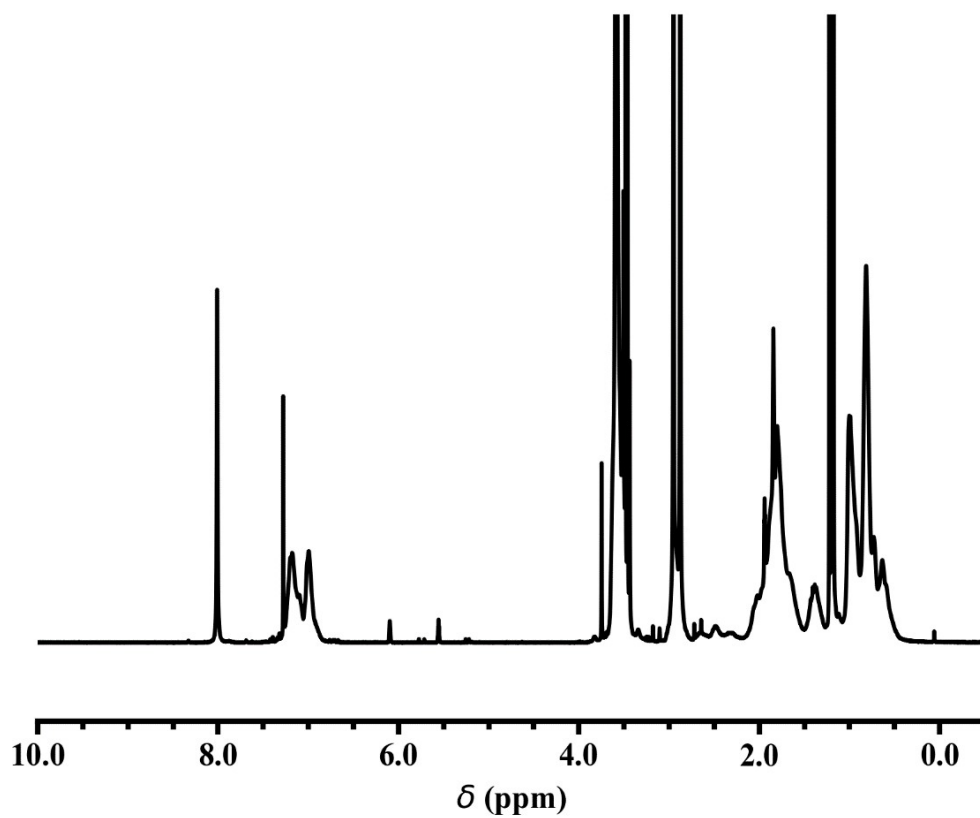

**Figure S5.** <sup>1</sup>H NMR spectrum of polymer **P5** (300 MHz, CDCl<sub>3</sub>).

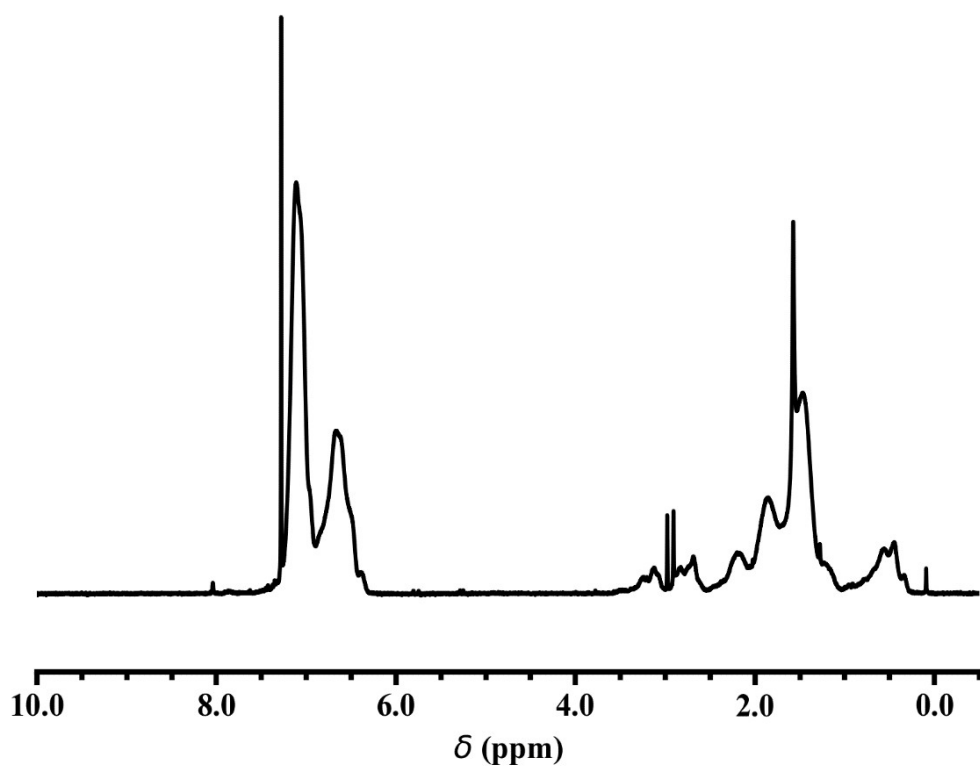

**Figure S6.** <sup>1</sup>H NMR spectrum of polymer **P6** (300 MHz, CDCl<sub>3</sub>).

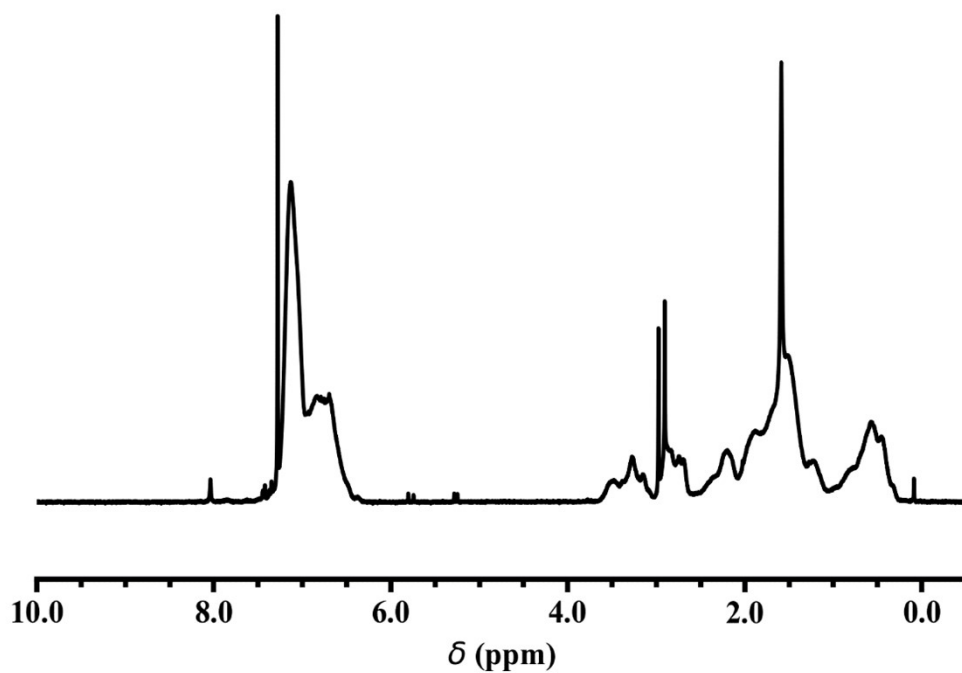

**Figure S7.** <sup>1</sup>H NMR spectrum of polymer **P7** (300 MHz, CDCl<sub>3</sub>).

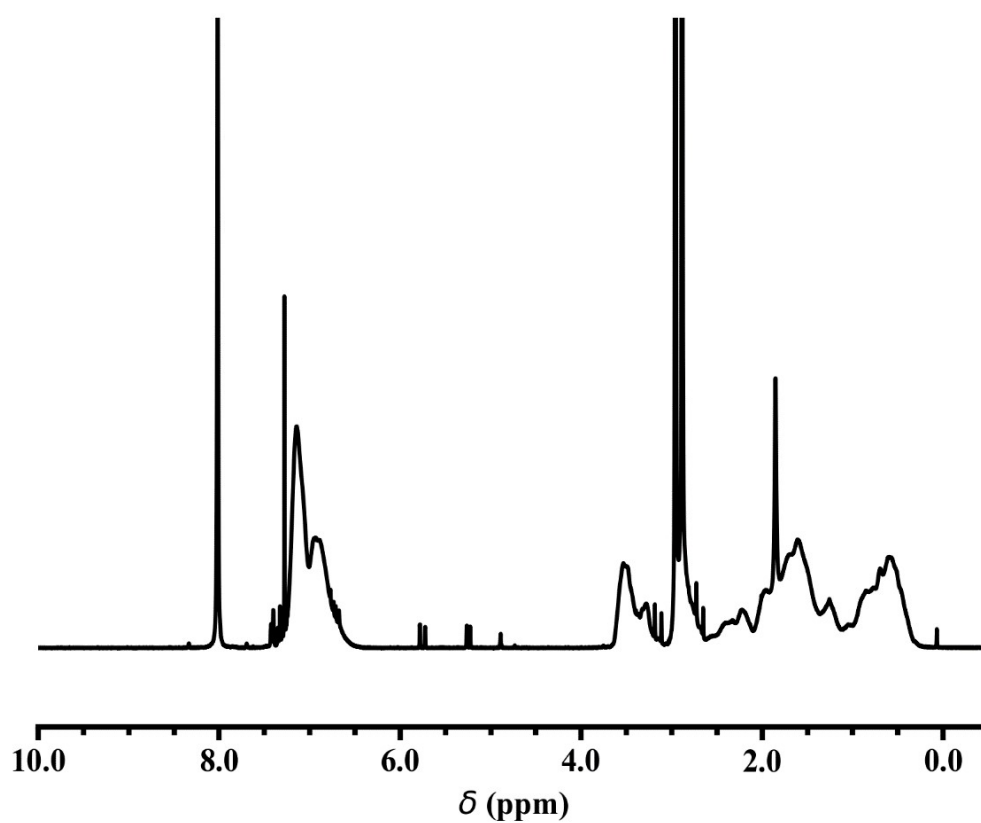

**Figure S8.** <sup>1</sup>H NMR spectrum of polymer **P8** (300 MHz, CDCl<sub>3</sub>).

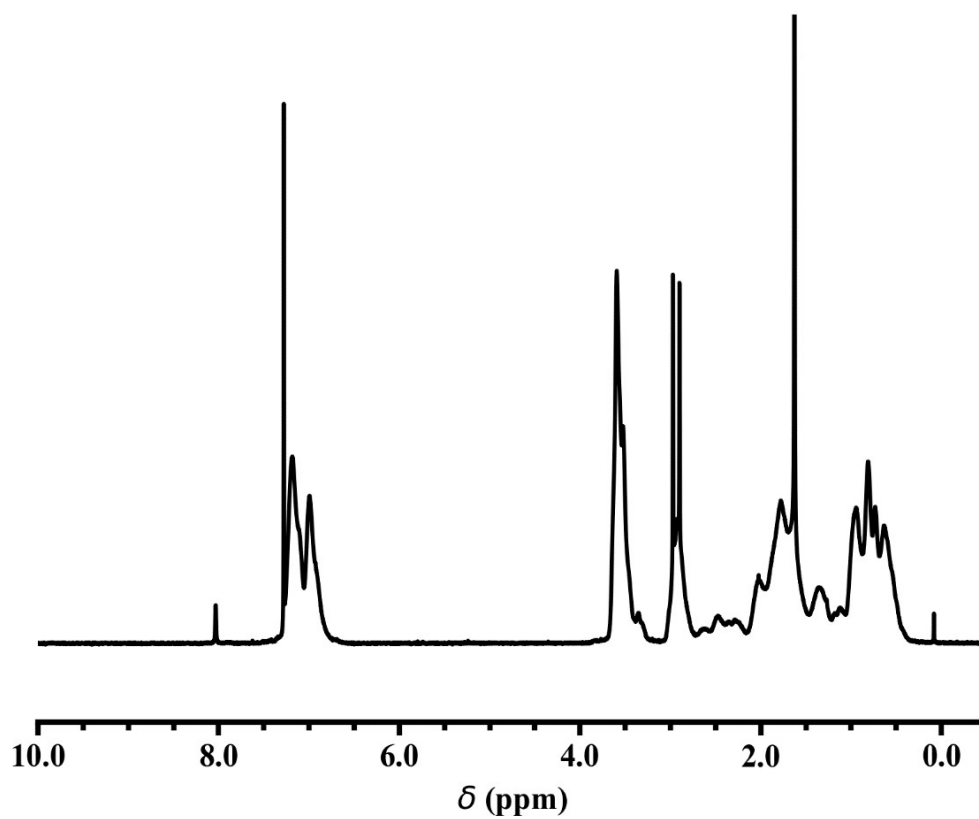

**Figure S9.** <sup>1</sup>H NMR spectrum of polymer **P9** (300 MHz, CDCl<sub>3</sub>).

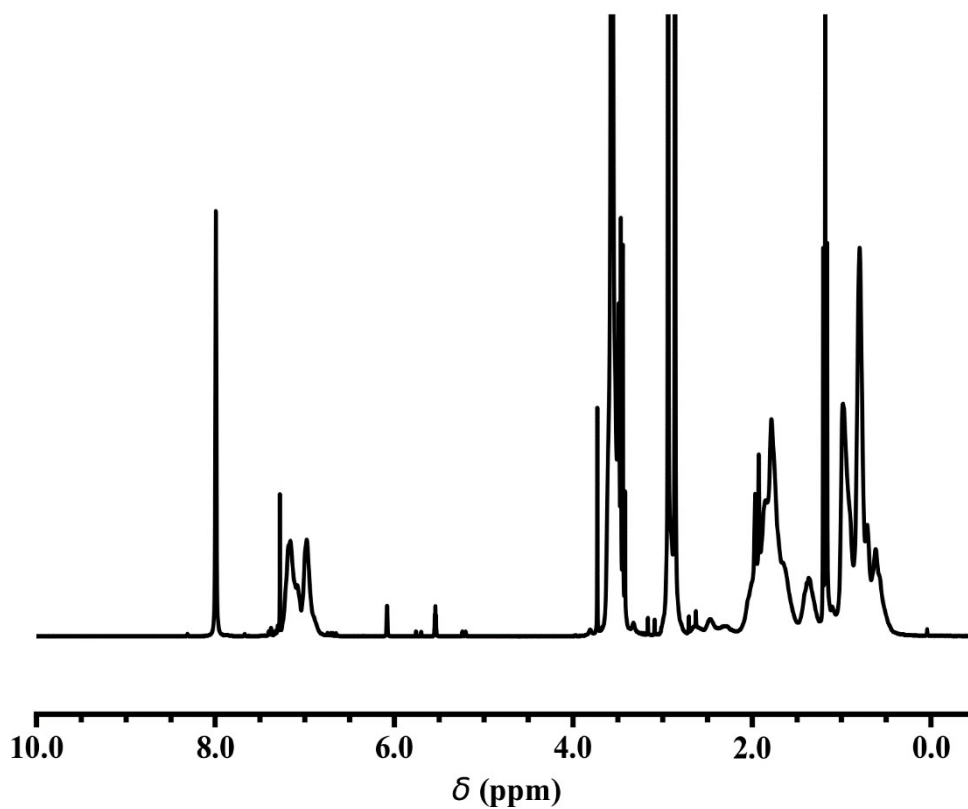

**Figure S10.** <sup>1</sup>H NMR spectrum of polymer **P10** (300 MHz, CDCl<sub>3</sub>).

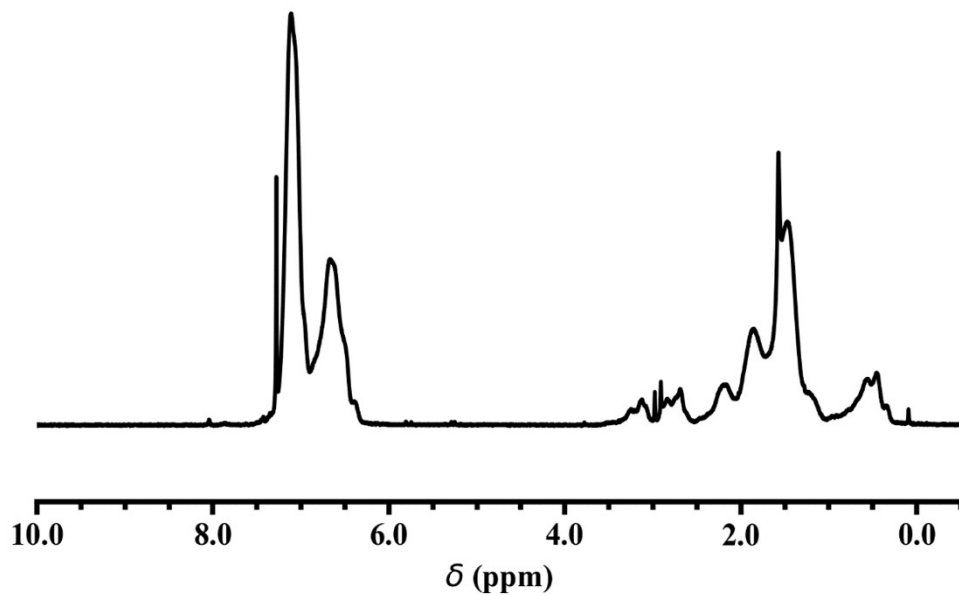

**Figure S11.** <sup>1</sup>H NMR spectrum of polymer **P11** (300 MHz, CDCl<sub>3</sub>).

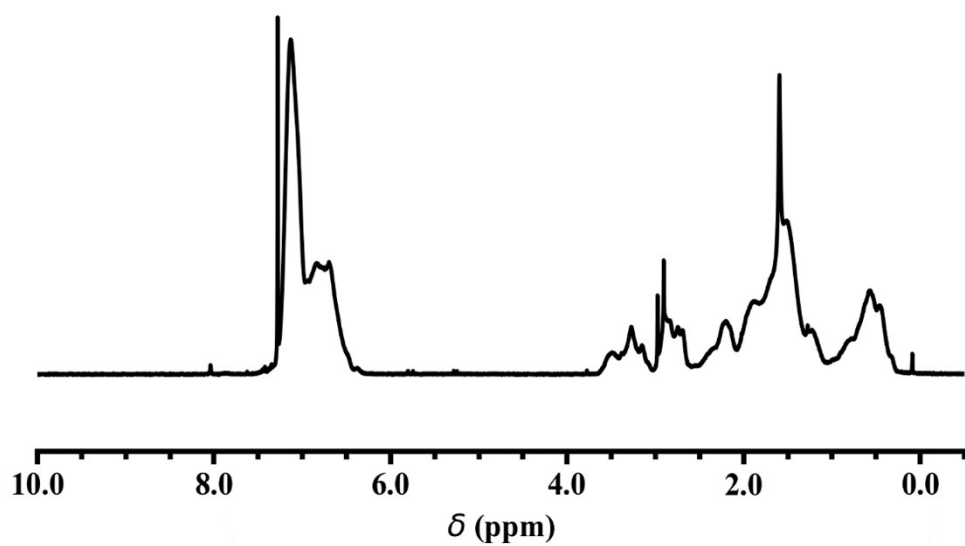

**Figure S12.** <sup>1</sup>H NMR spectrum of polymer **P12** (300 MHz, CDCl<sub>3</sub>).



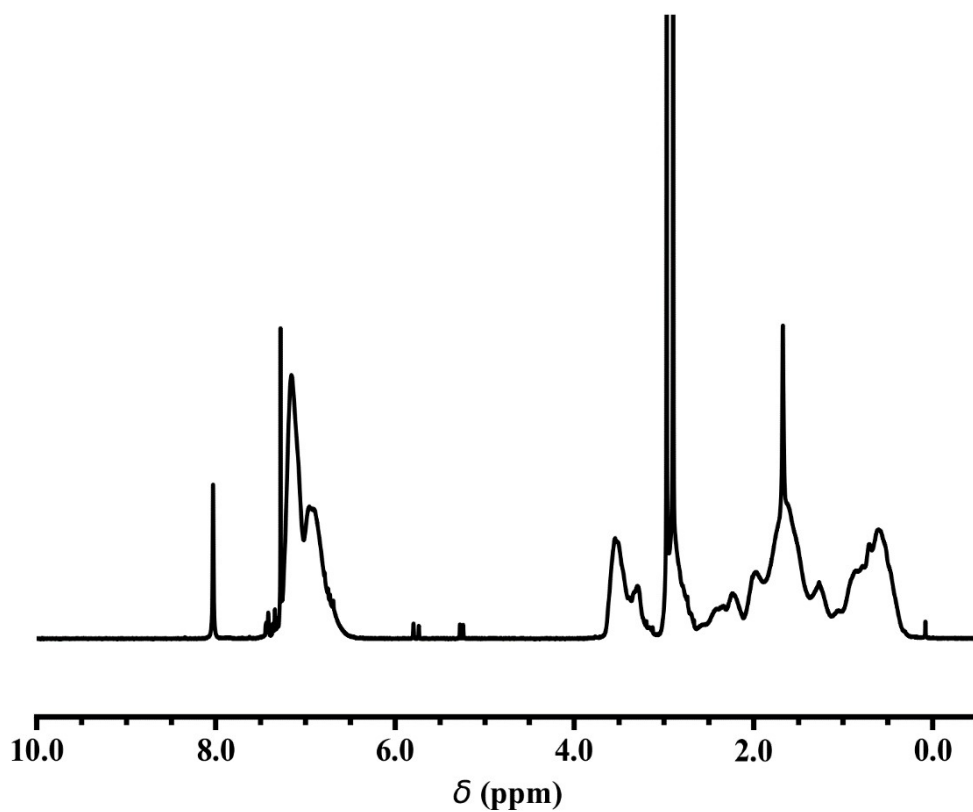

**Figure S13.** <sup>1</sup>H NMR spectrum of polymer **P13** (300 MHz, CDCl<sub>3</sub>).

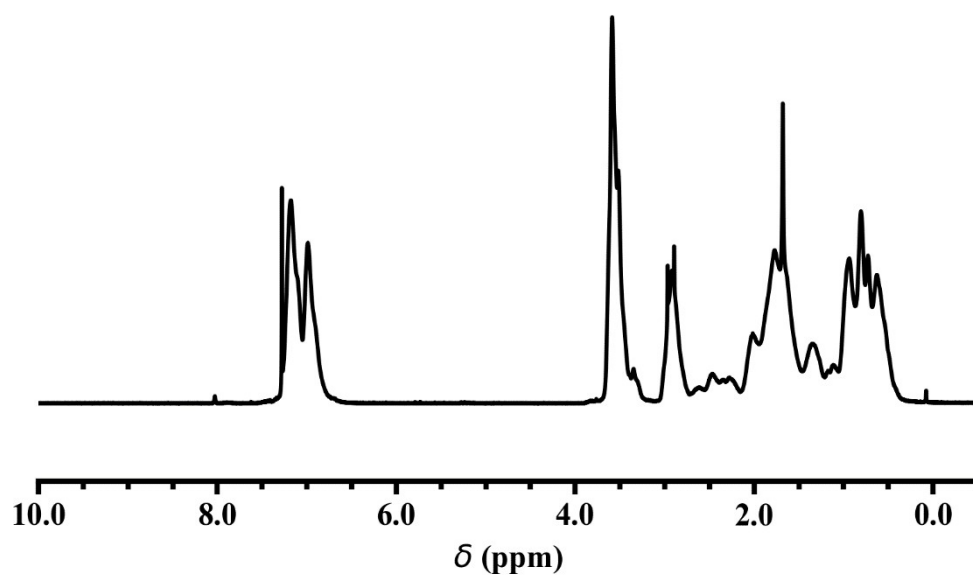

**Figure S14.** <sup>1</sup>H NMR spectrum of polymer **P14** (300 MHz, CDCl<sub>3</sub>).

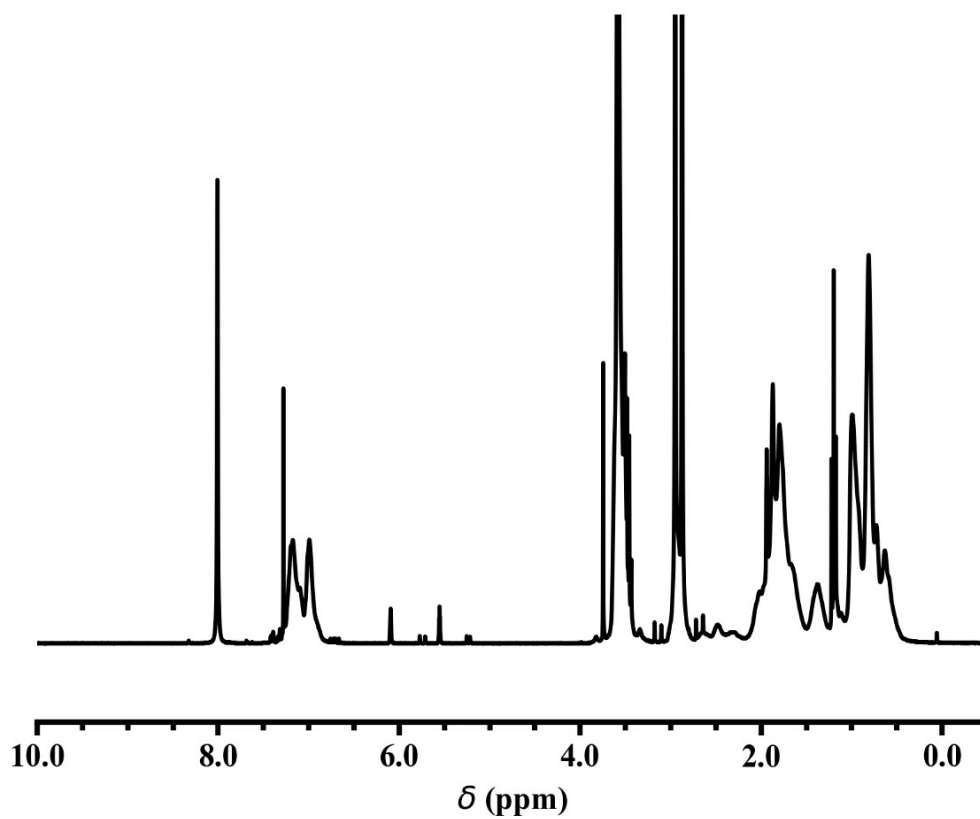

**Figure S15.** <sup>1</sup>H NMR spectrum of polymer P15 (300 MHz, CDCl<sub>3</sub>).

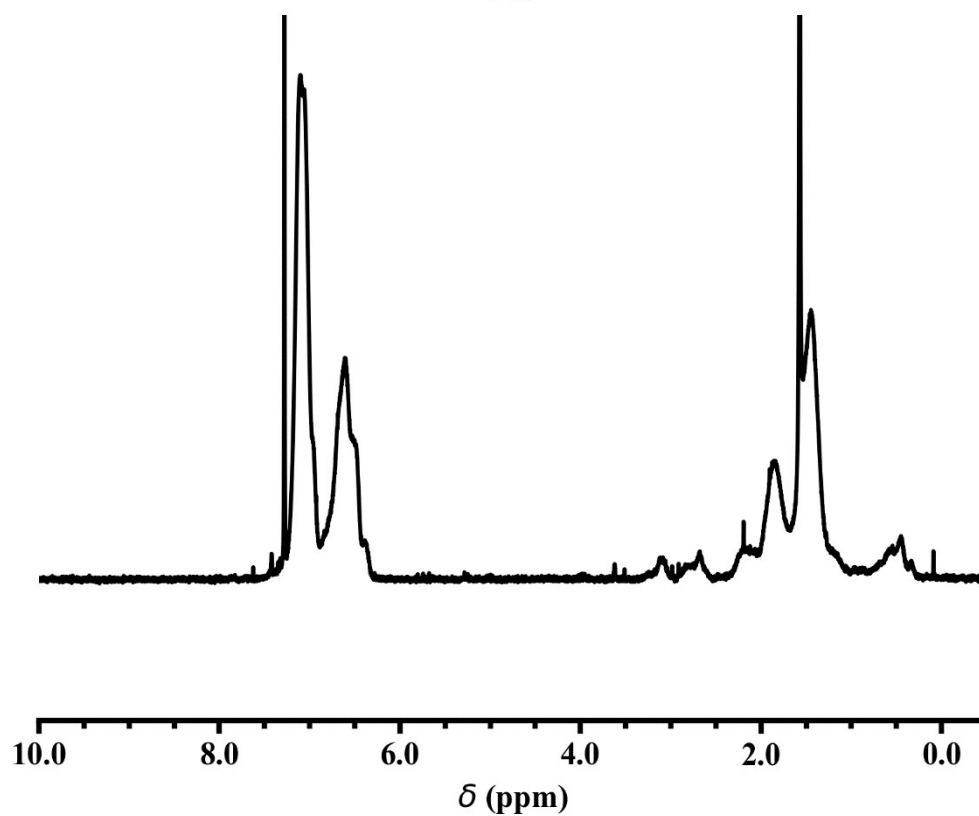

**Figure S16.** <sup>1</sup>H NMR spectrum of polymer P16 (300 MHz, CDCl<sub>3</sub>).

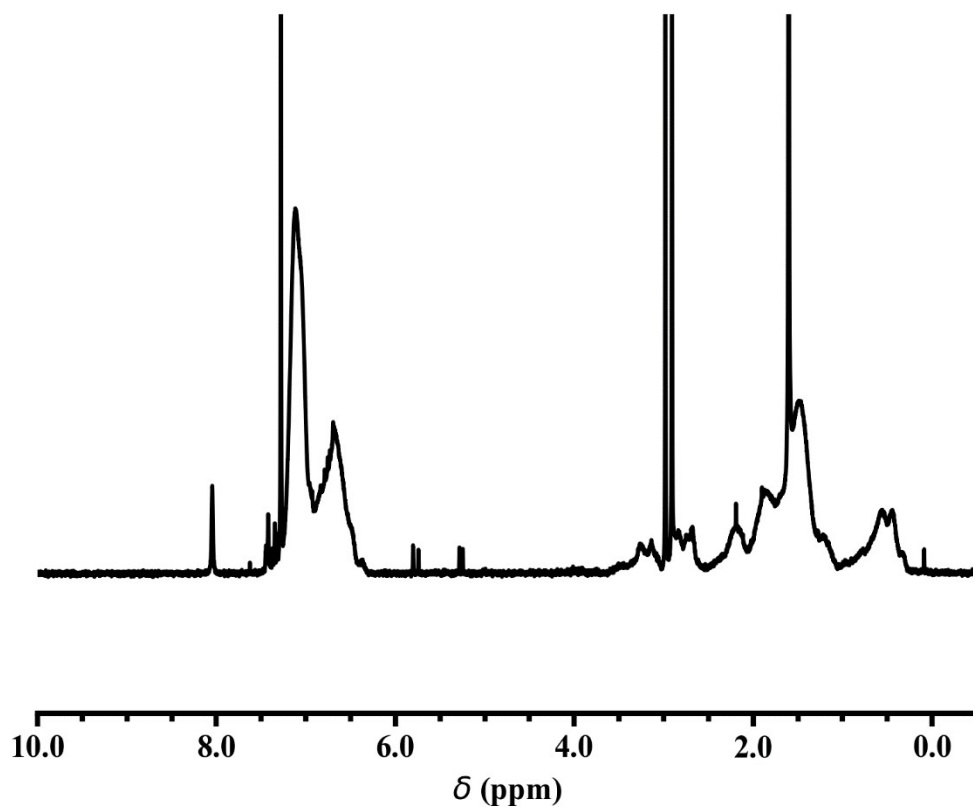

**Figure S17.** <sup>1</sup>H NMR spectrum of polymer P17 (300 MHz, CDCl<sub>3</sub>).

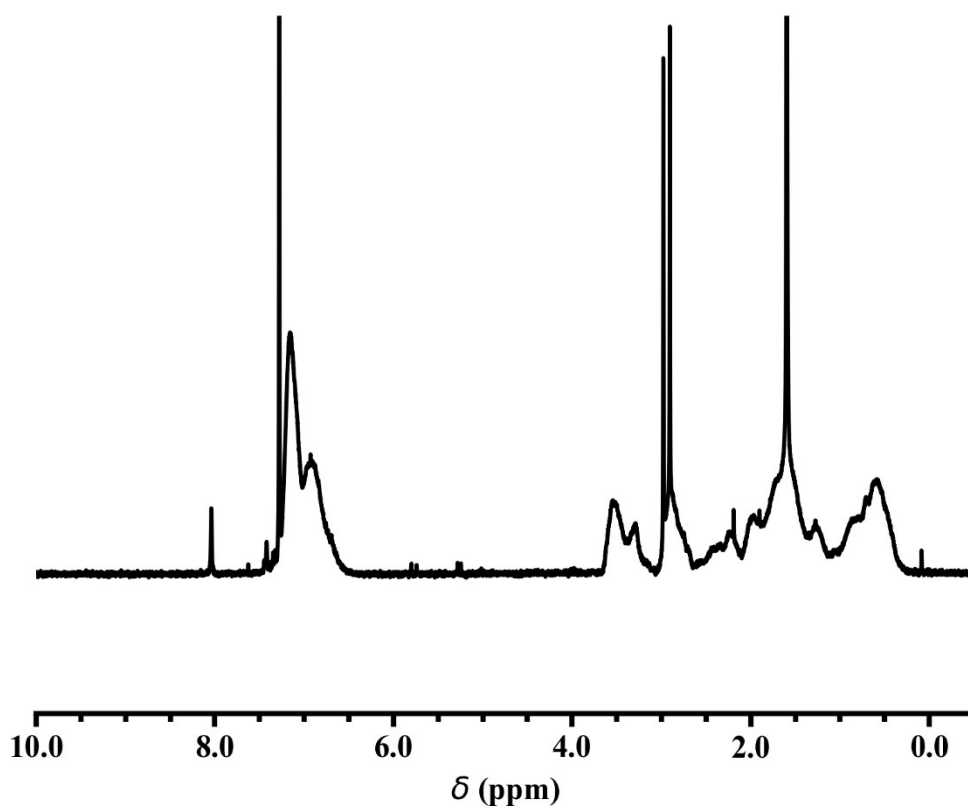

**Figure S18.** <sup>1</sup>H NMR spectrum of polymer P18 (300 MHz, CDCl<sub>3</sub>).

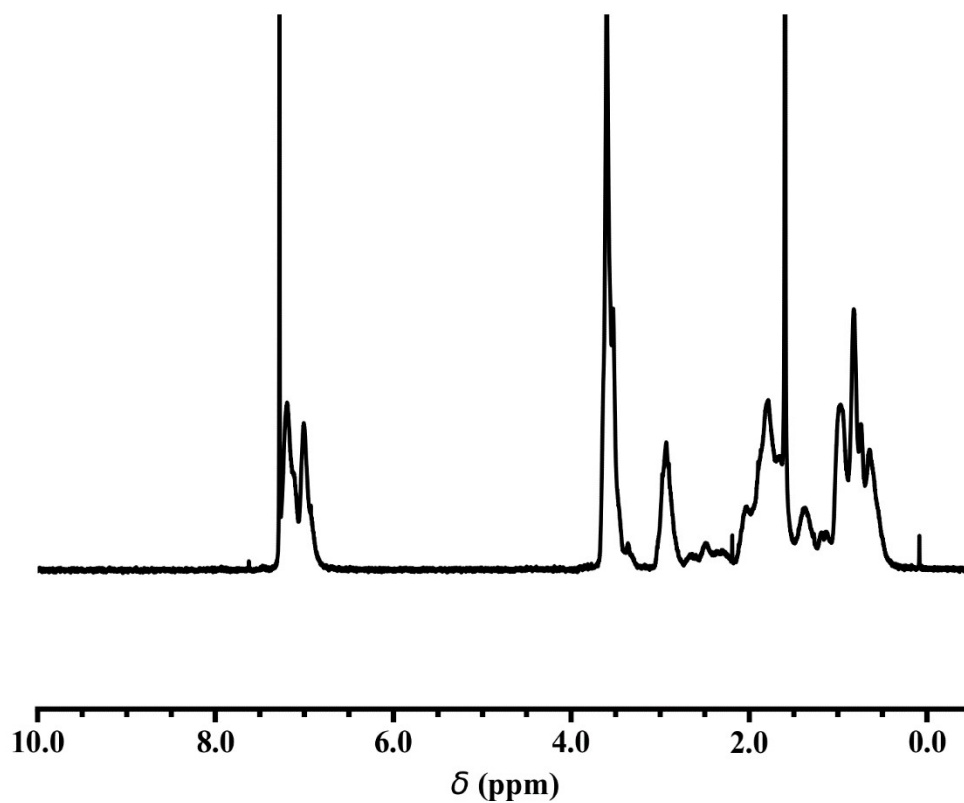

**Figure S19.** <sup>1</sup>H NMR spectrum of polymer P19 (300 MHz, CDCl<sub>3</sub>).

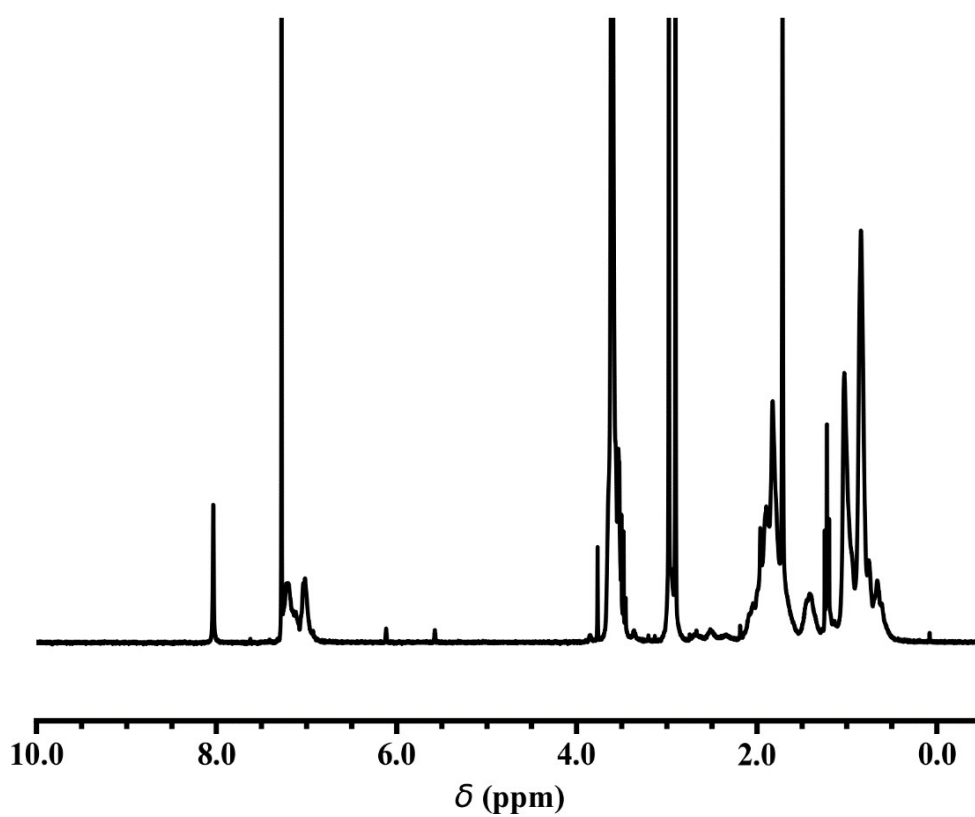

**Figure S20.** <sup>1</sup>H NMR spectrum of polymer P20 (300 MHz, CDCl<sub>3</sub>).

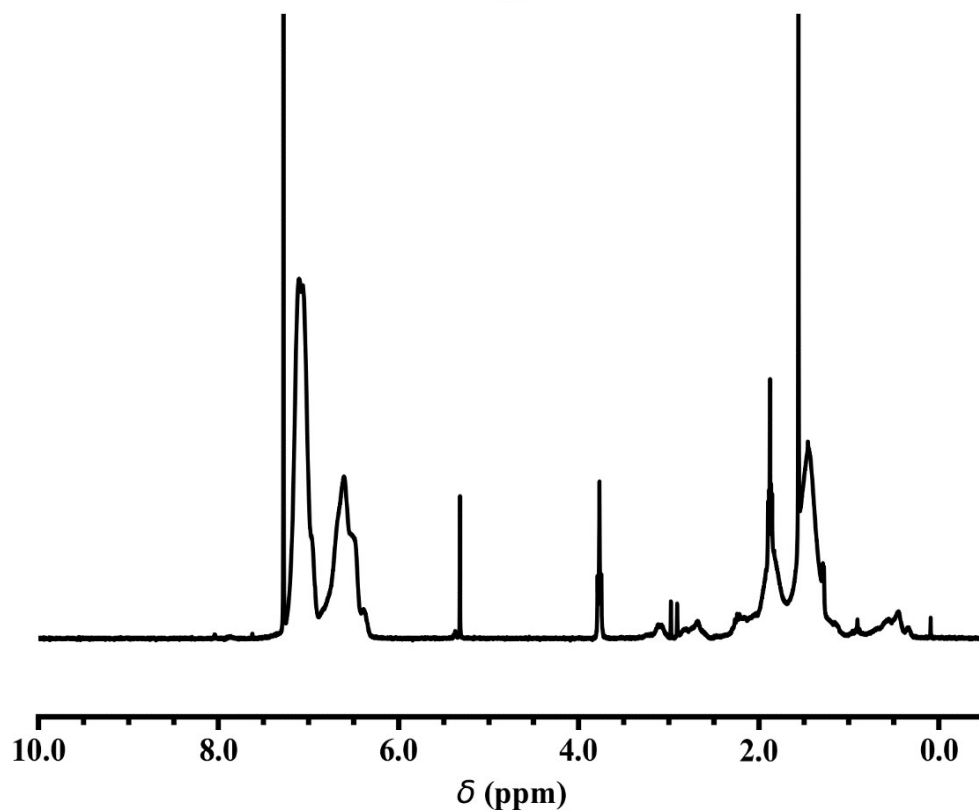

**Figure S21.**  $^1\text{H}$  NMR spectrum of polymer U1 (300 MHz,  $\text{CDCl}_3$ ).

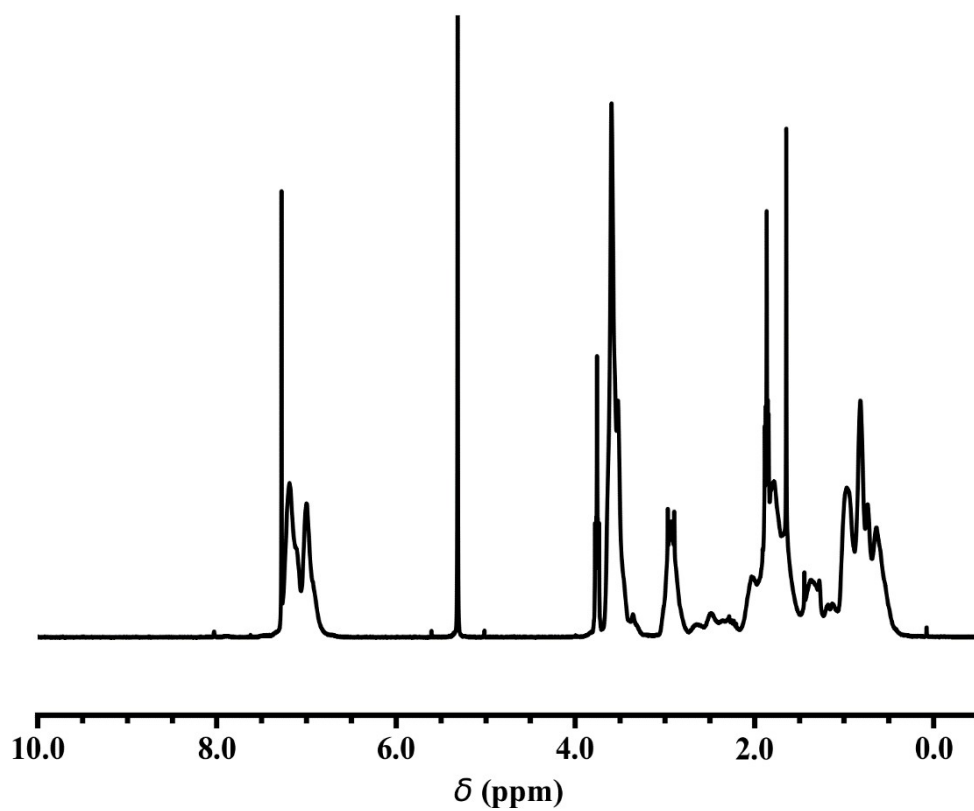

**Figure S22.**  $^1\text{H}$  NMR spectrum of polymer U2 (300 MHz,  $\text{CDCl}_3$ ).

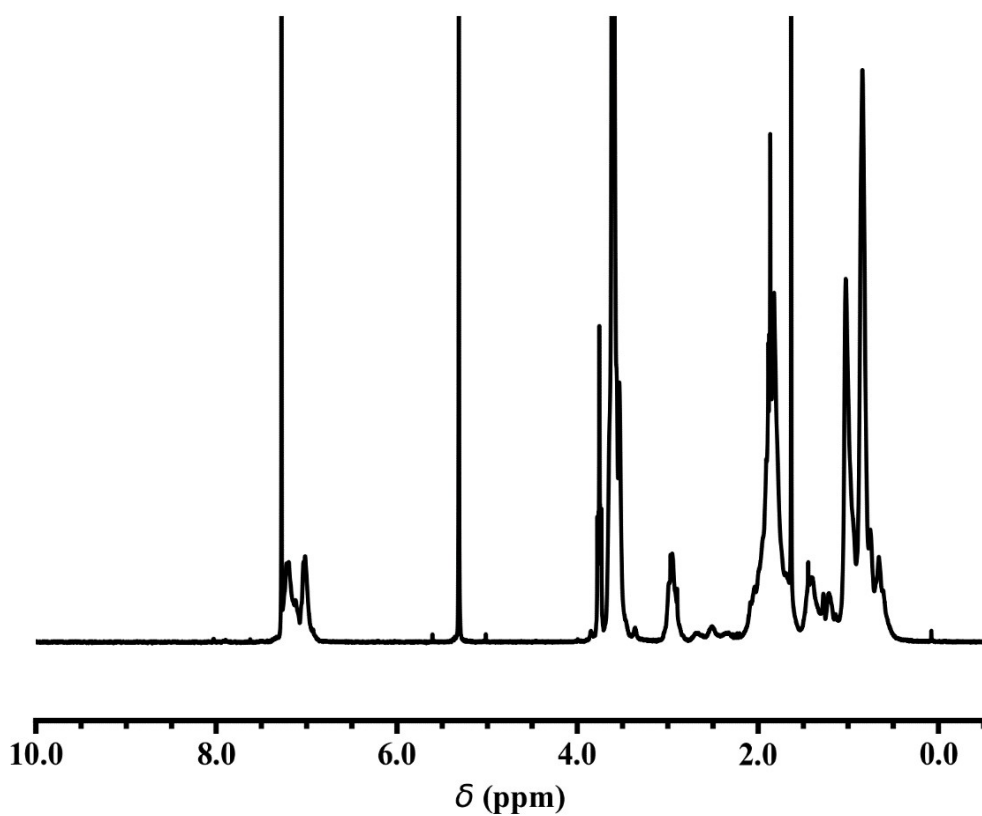

**Figure S23.** <sup>1</sup>H NMR spectrum of polymer U3 (300 MHz, CDCl<sub>3</sub>).

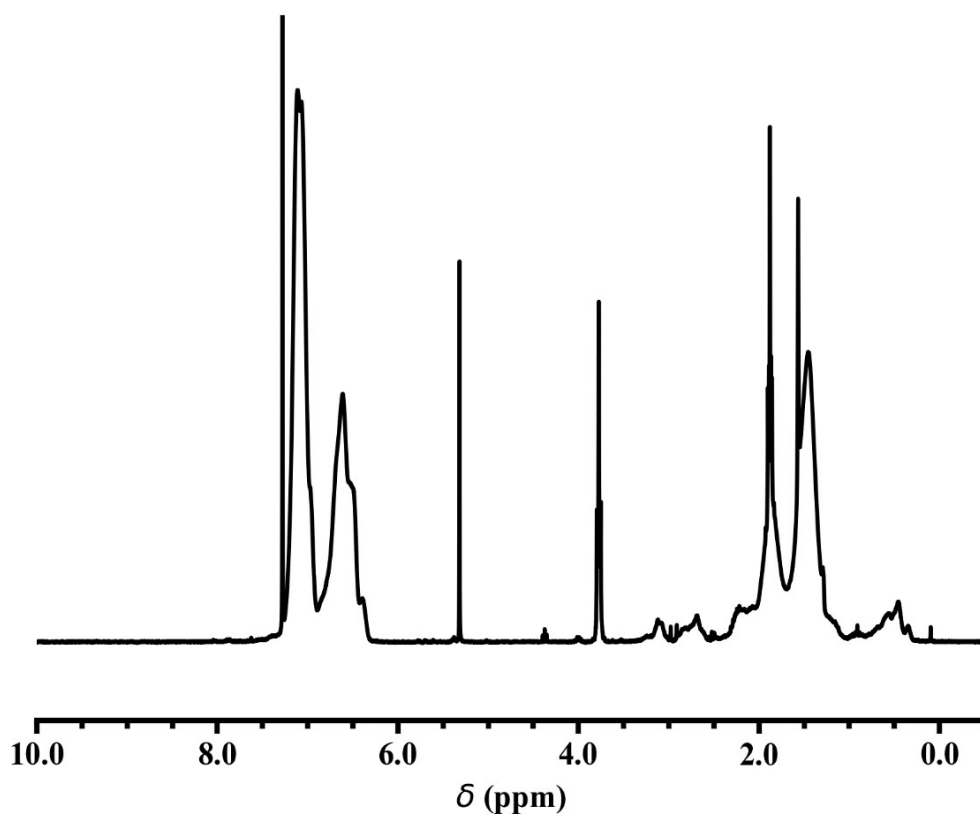

**Figure S24.** <sup>1</sup>H NMR spectrum of polymer U4 (300 MHz, CDCl<sub>3</sub>).

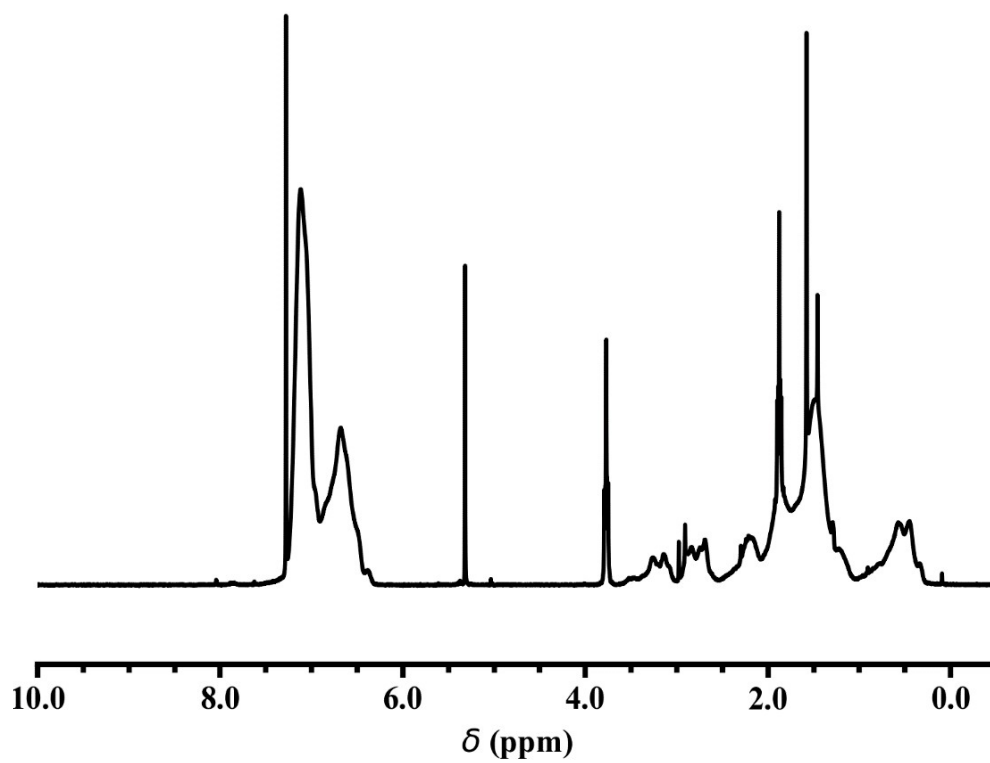

**Figure S25.**  $^1\text{H}$  NMR spectrum of polymer U5 (300 MHz,  $\text{CDCl}_3$ ).

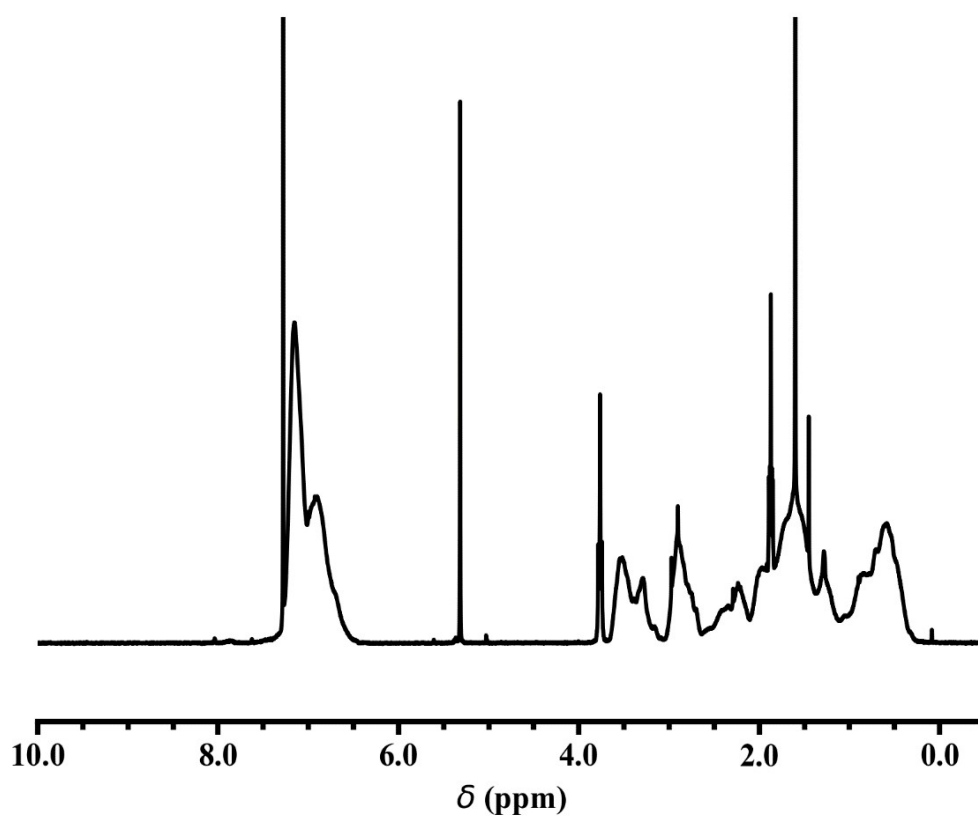

**Figure S26.**  $^1\text{H}$  NMR spectrum of polymer U6 (300 MHz,  $\text{CDCl}_3$ ).

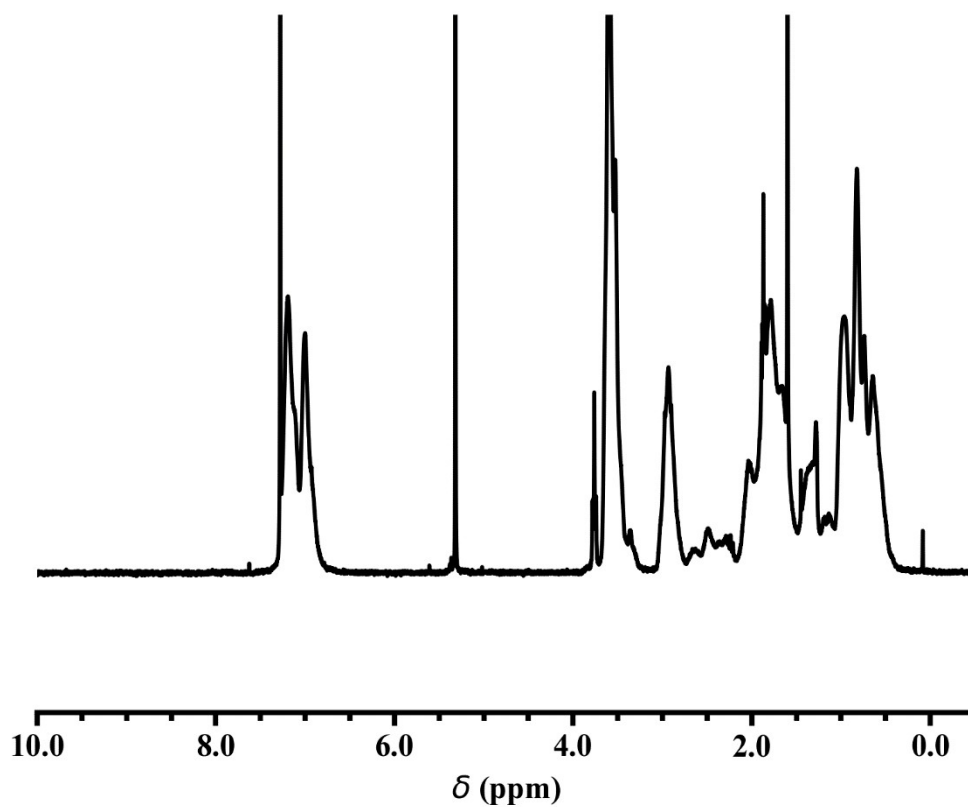

**Figure S27.**  $^1\text{H}$  NMR spectrum of polymer U7 (300 MHz,  $\text{CDCl}_3$ ).

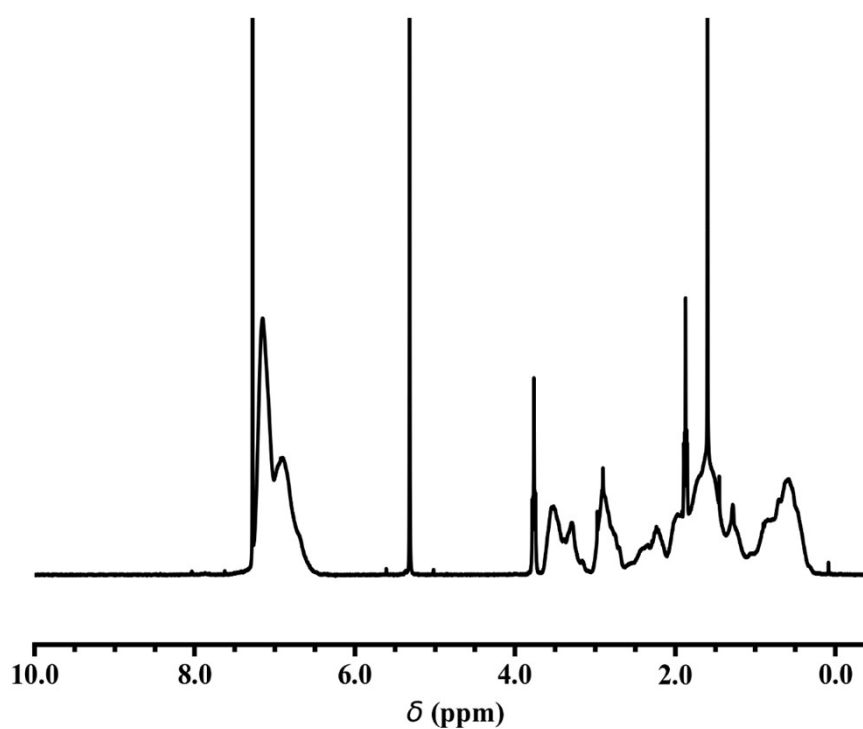

**Figure S28.**  $^1\text{H}$  NMR spectrum of polymer U8 (300 MHz,  $\text{CDCl}_3$ ).



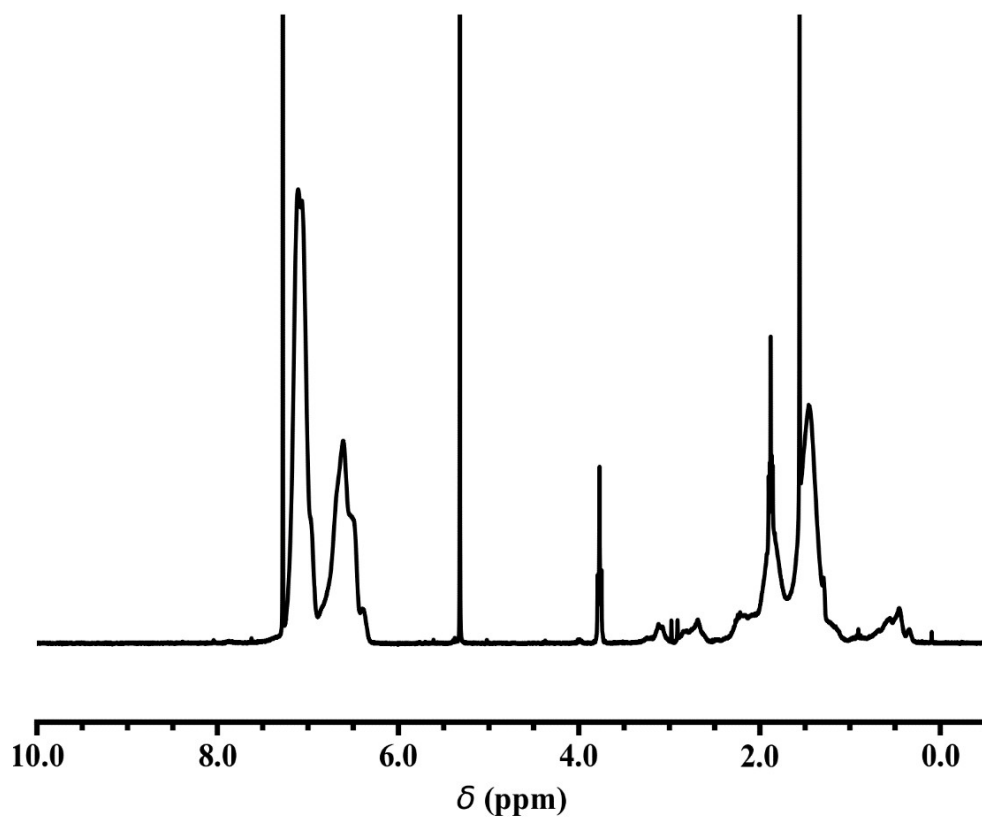

**Figure S29.** <sup>1</sup>H NMR spectrum of polymer U9 (300 MHz, CDCl<sub>3</sub>).

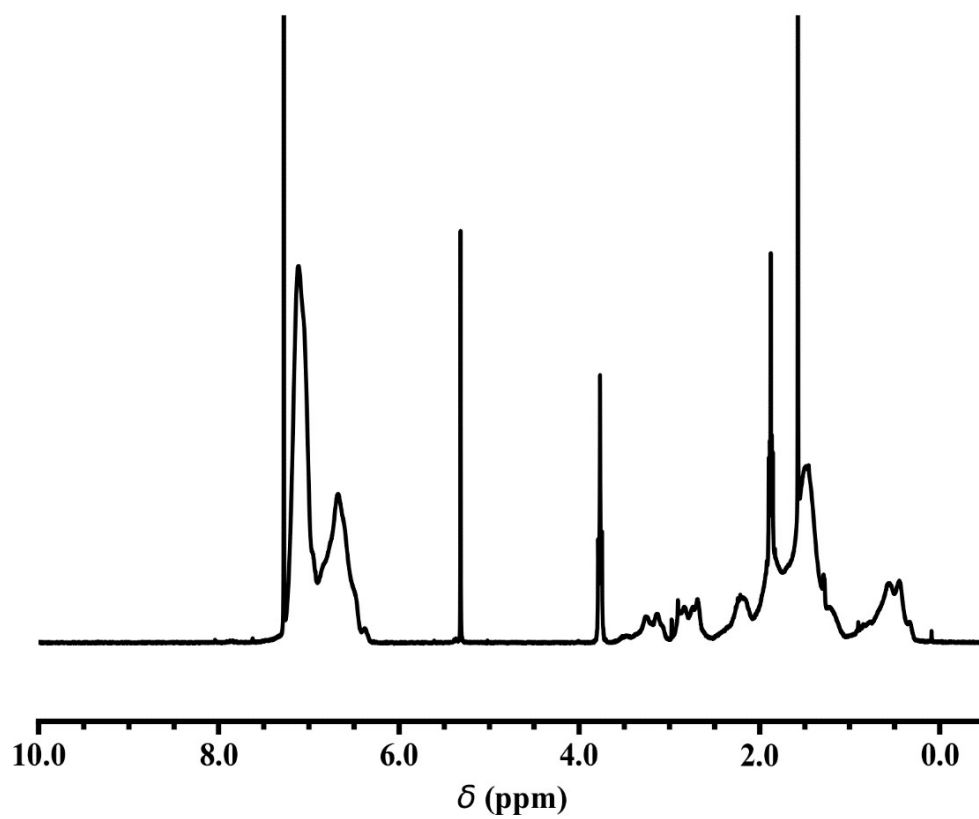

**Figure S30.** <sup>1</sup>H NMR spectrum of polymer U10 (300 MHz, CDCl<sub>3</sub>).

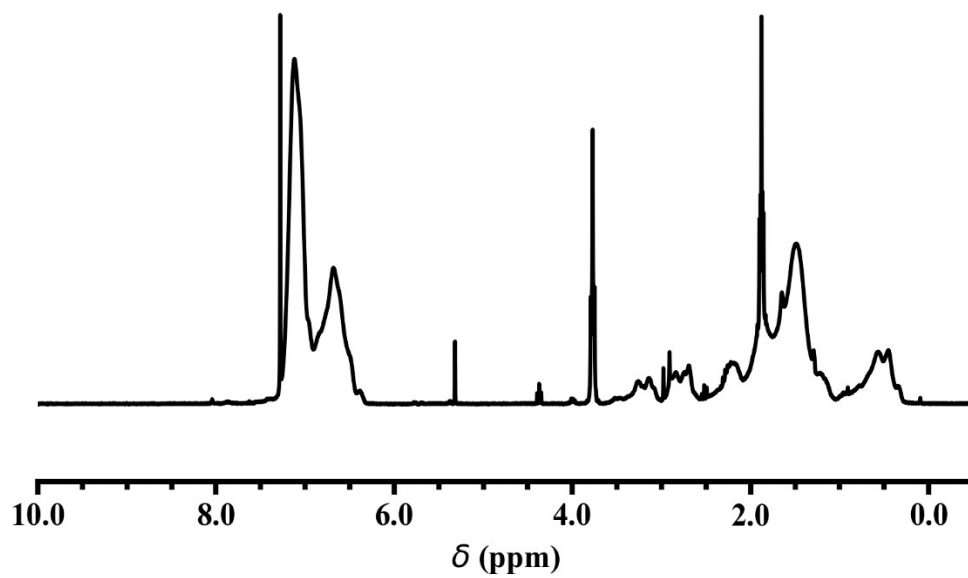

**Figure S31.** <sup>1</sup>H NMR spectrum of polymer U11 (300 MHz, CDCl<sub>3</sub>).

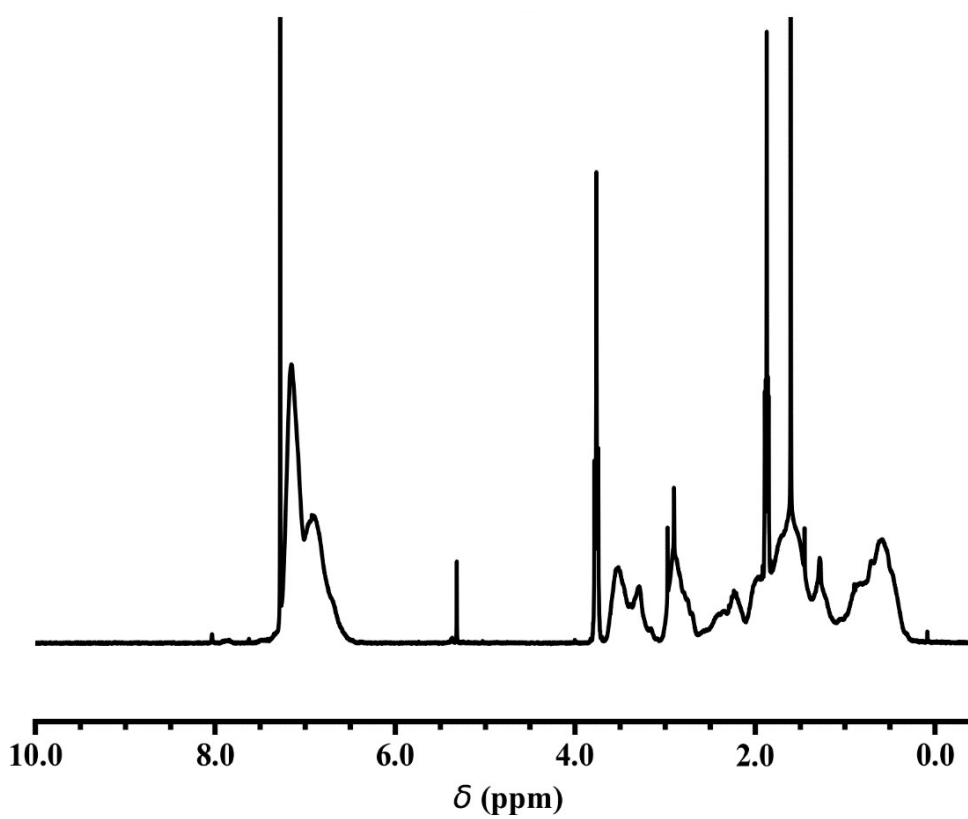

**Figure S32.** <sup>1</sup>H NMR spectrum of polymer U12 (300 MHz, CDCl<sub>3</sub>).

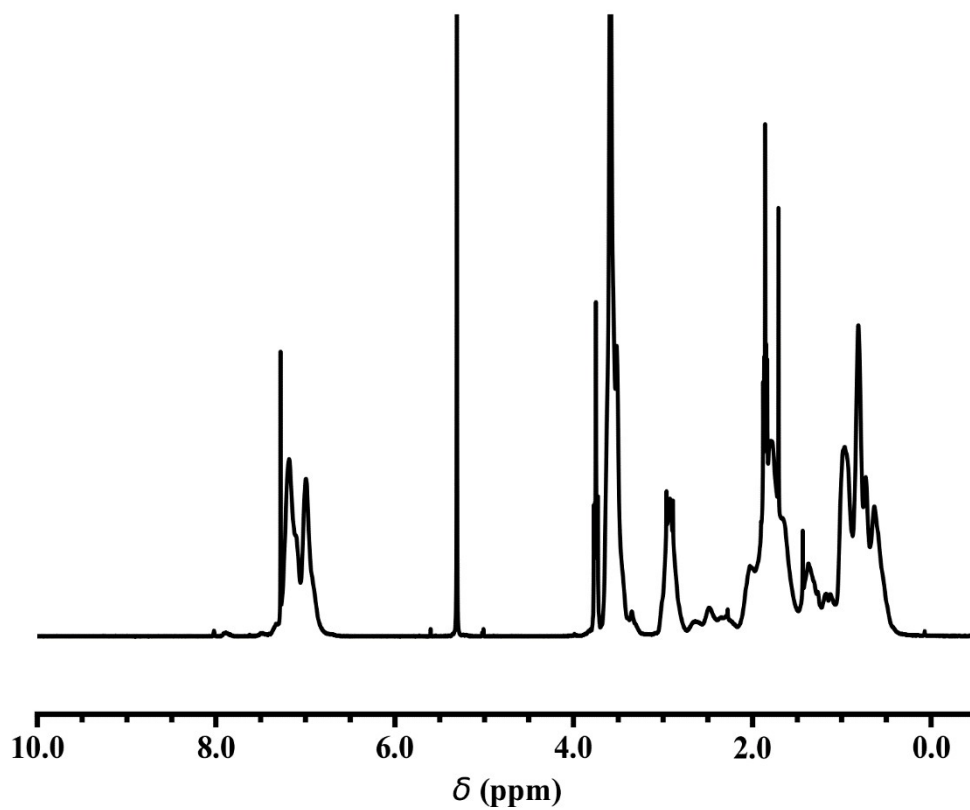

**Figure S33.** <sup>1</sup>H NMR spectrum of polymer U13 (300 MHz, CDCl<sub>3</sub>).

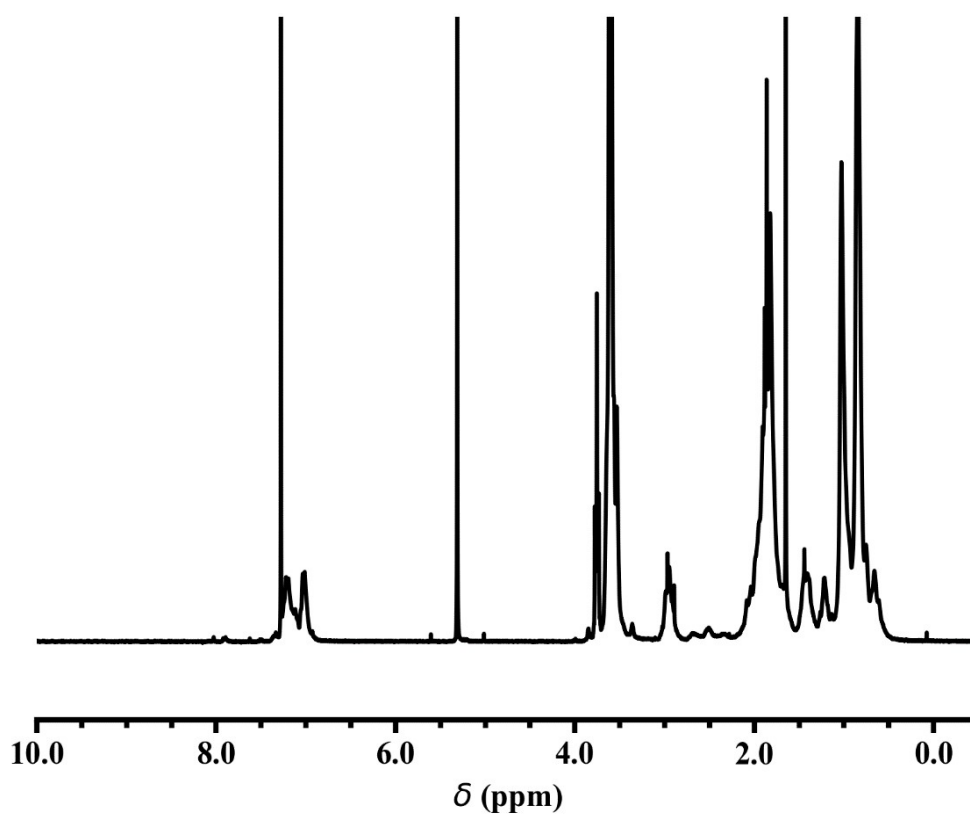

**Figure S34.** <sup>1</sup>H NMR spectrum of polymer U14 (300 MHz, CDCl<sub>3</sub>).

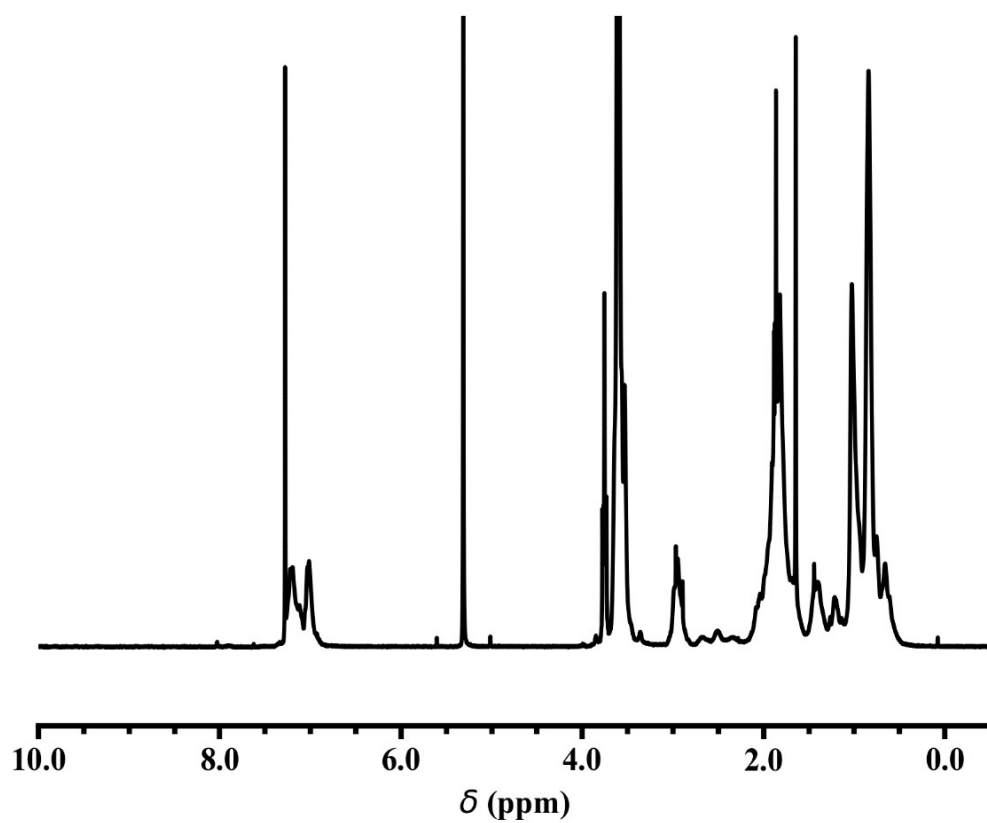

**Figure S35.** <sup>1</sup>H NMR spectrum of polymer U15 (300 MHz, CDCl<sub>3</sub>).

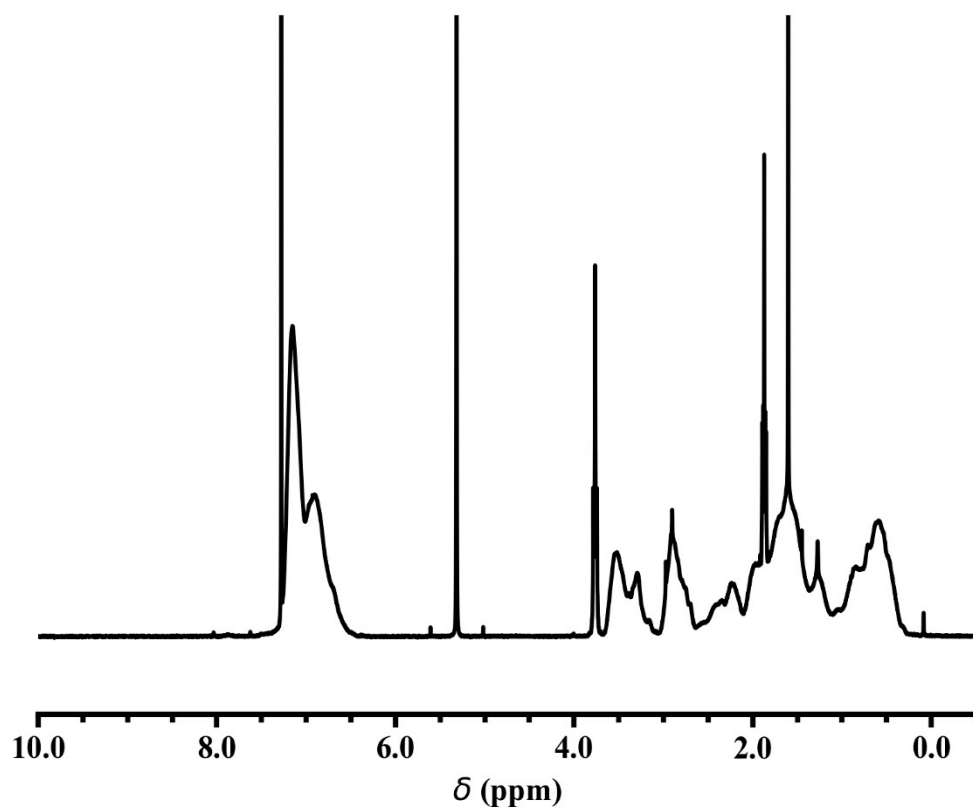

**Figure S36.** <sup>1</sup>H NMR spectrum of polymer U16 (300 MHz, CDCl<sub>3</sub>).

### SEC elugrams

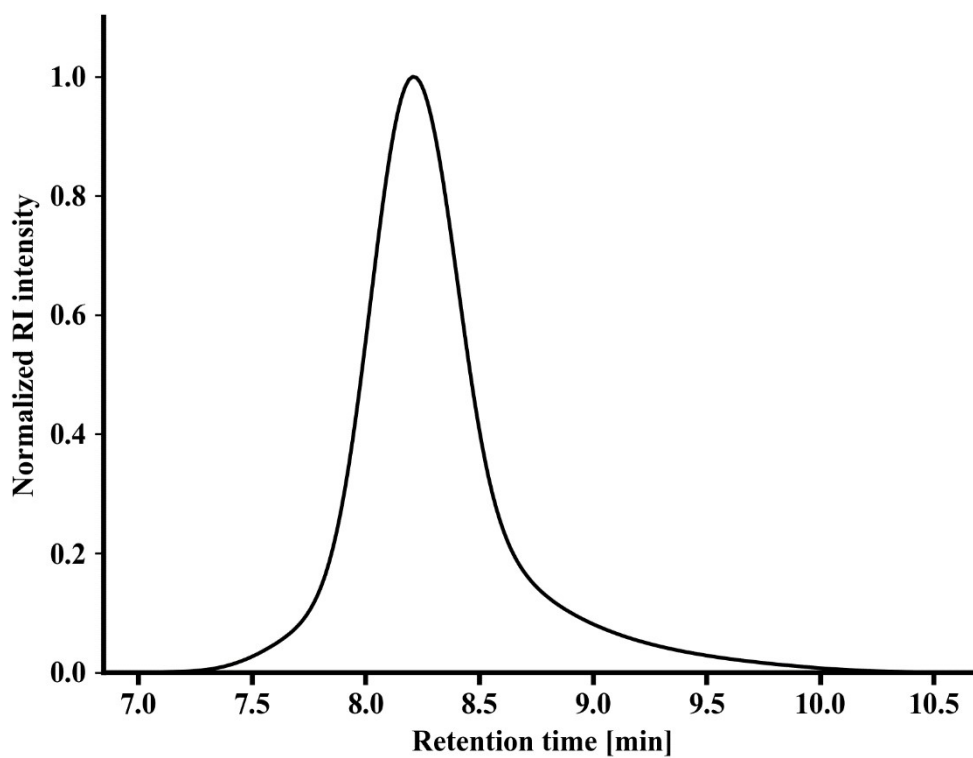

**Figure S37.** SEC-curve of polymer **P1** (chloroform/isopropanol/triethylamine [94/2/4], PS-standard).

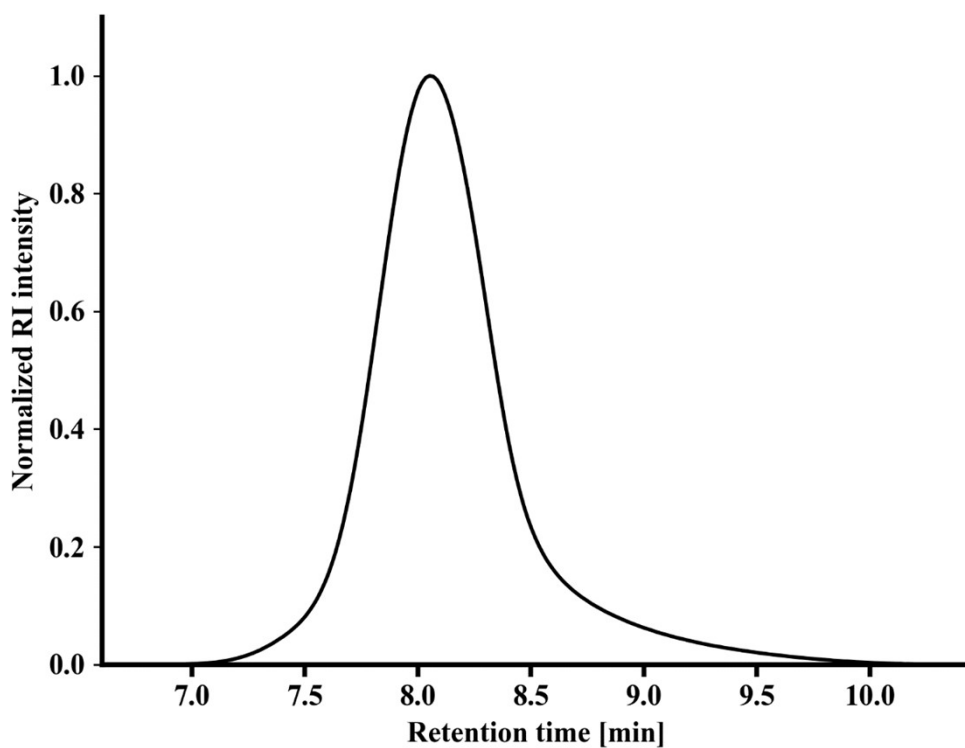

**Figure S38.** SEC-curve of polymer **P2** (chloroform/isopropanol/triethylamine [94/2/4], PS-standard).

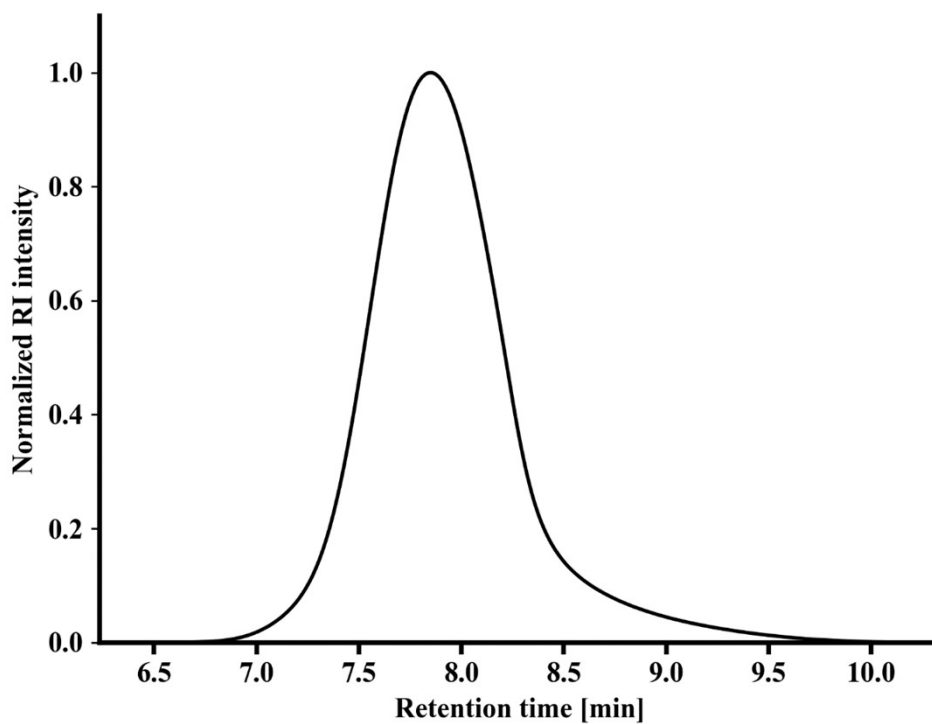

**Figure S39.** SEC-curve of polymer **P3** (chloroform/isopropanol/triethylamine [94/2/4], PMMA-standard).

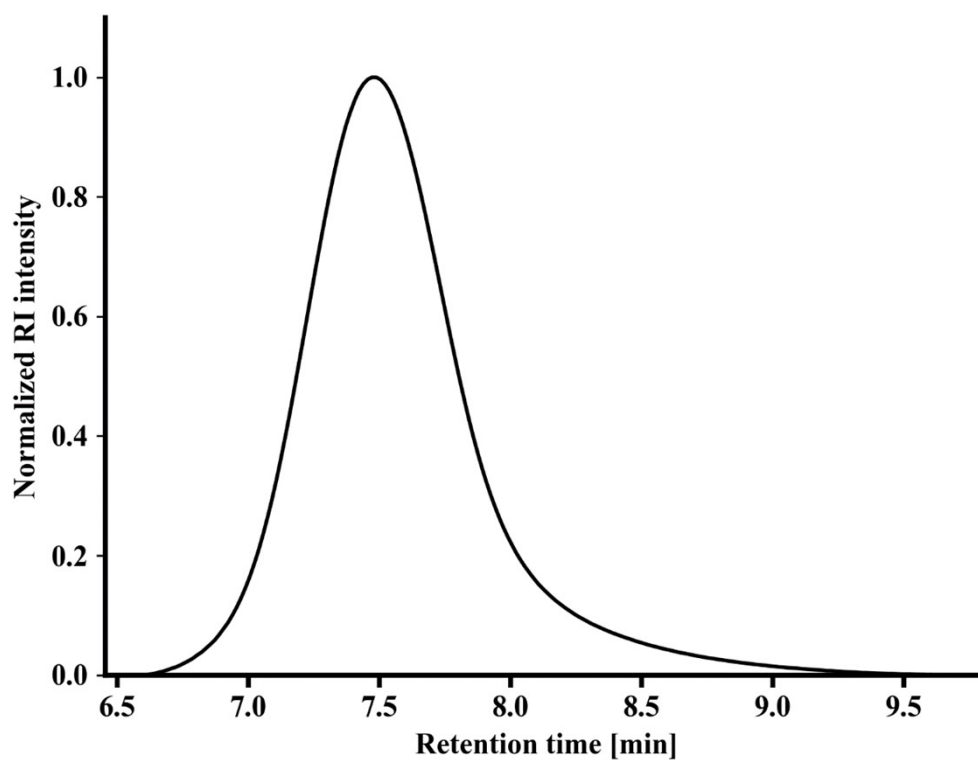

**Figure S40.** SEC-curve of polymer **P4** (chloroform/isopropanol/triethylamine [94/2/4], PMMA-standard).

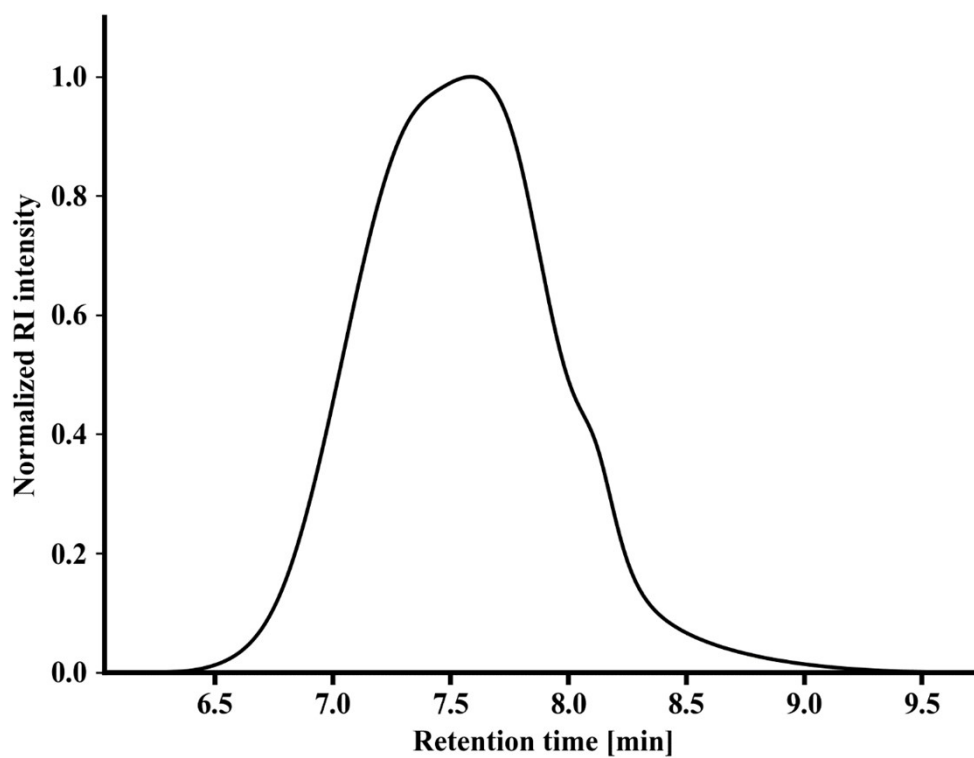

**Figure S41.** SEC-curve of polymer **P5** (chloroform/isopropanol/triethylamine [94/2/4], PMMA-standard).

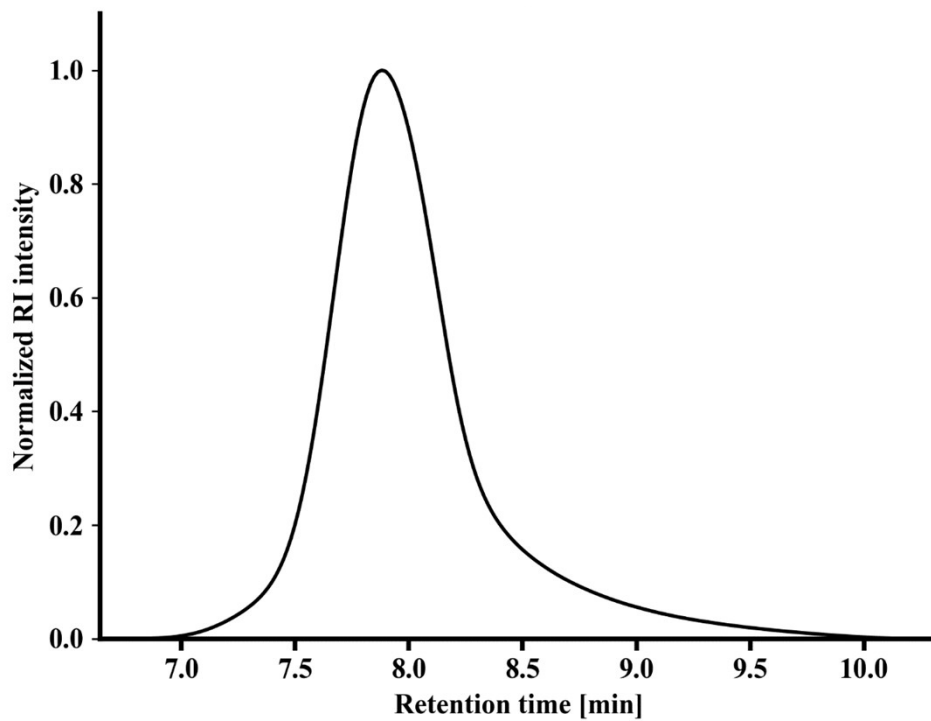

**Figure S42.** SEC-curve of polymer **P6** (chloroform/isopropanol/triethylamine [94/2/4], PS-standard).

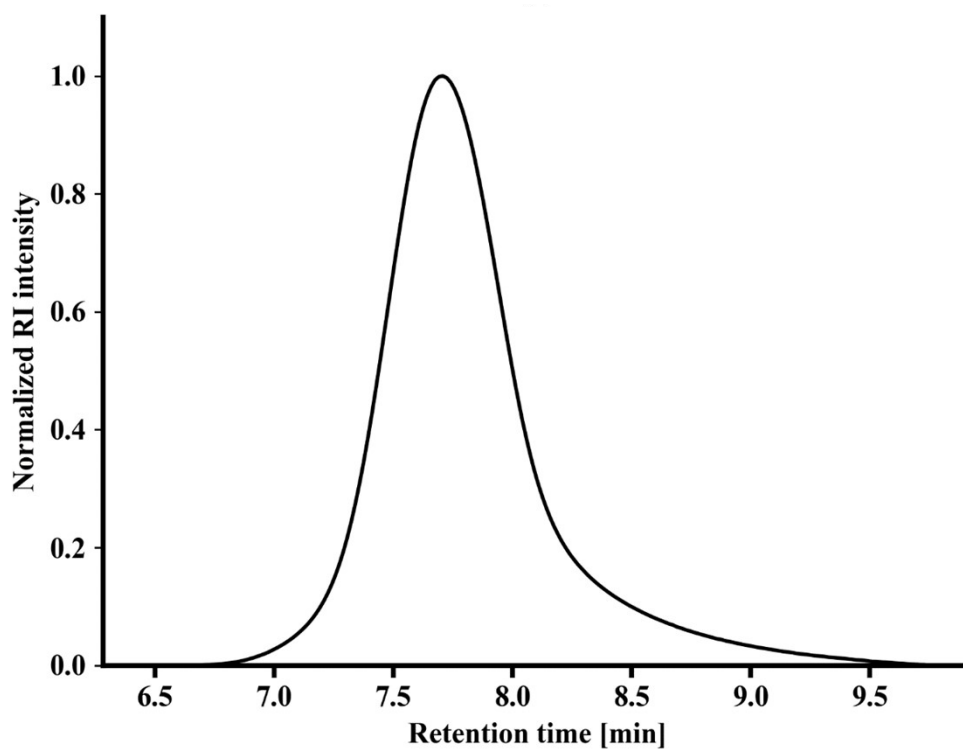

**Figure S43.** SEC-curve of polymer **P7** (chloroform/isopropanol/triethylamine [94/2/4], PS-standard).

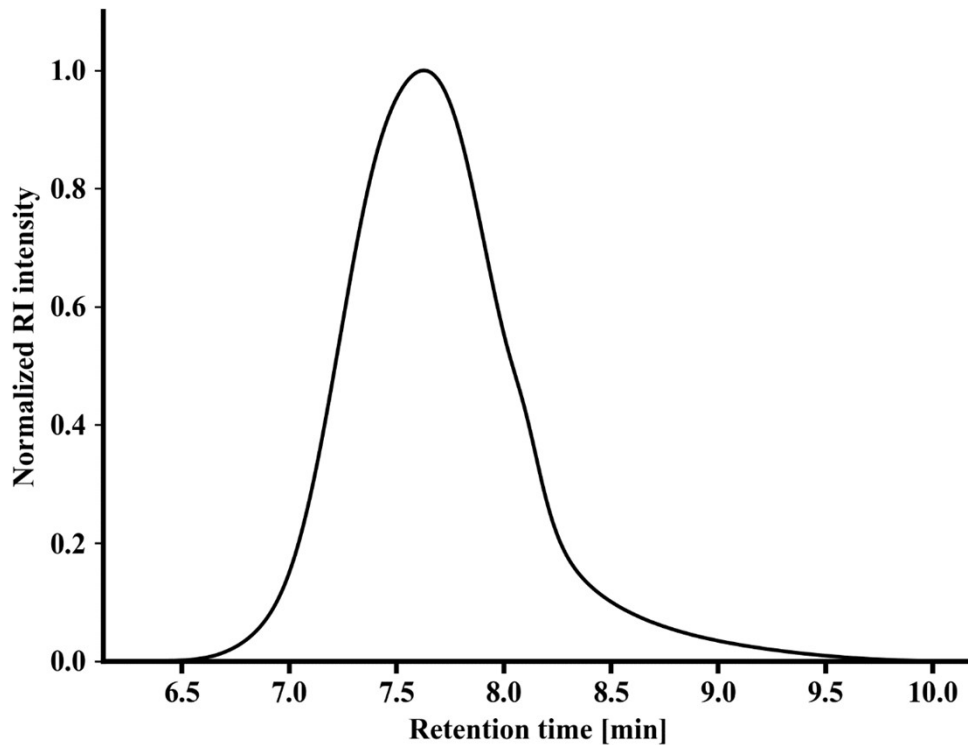

**Figure S44.** SEC-curve of polymer **P8** (chloroform/isopropanol/triethylamine [94/2/4], PMMA-standard).



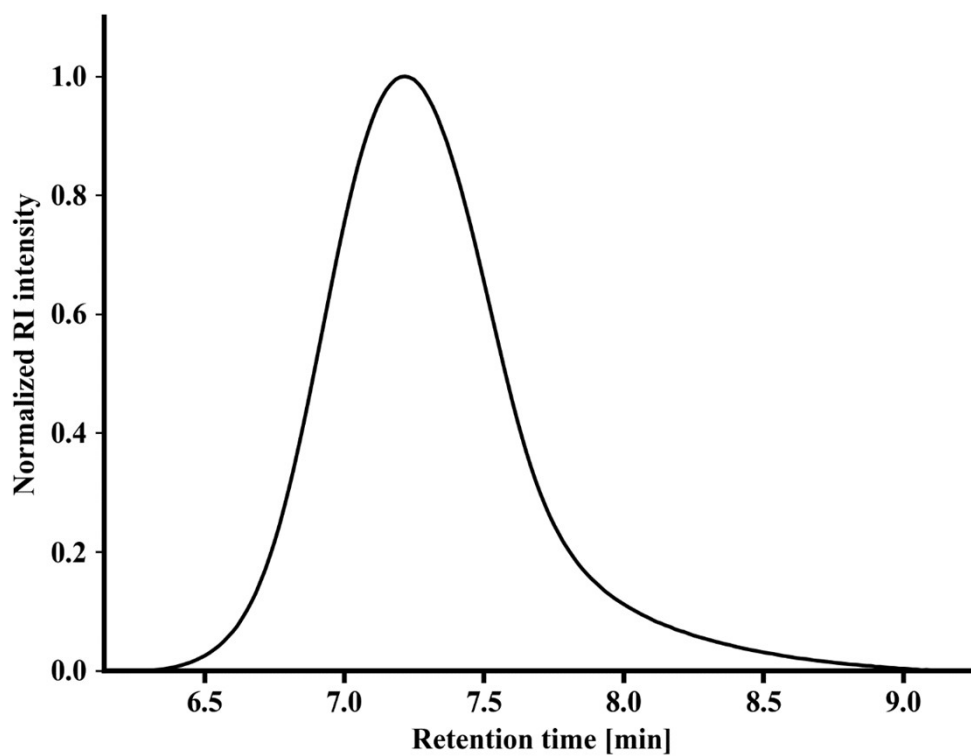

**Figure S45.** SEC-curve of polymer **P9** (chloroform/isopropanol/triethylamine [94/2/4], PMMA-standard).

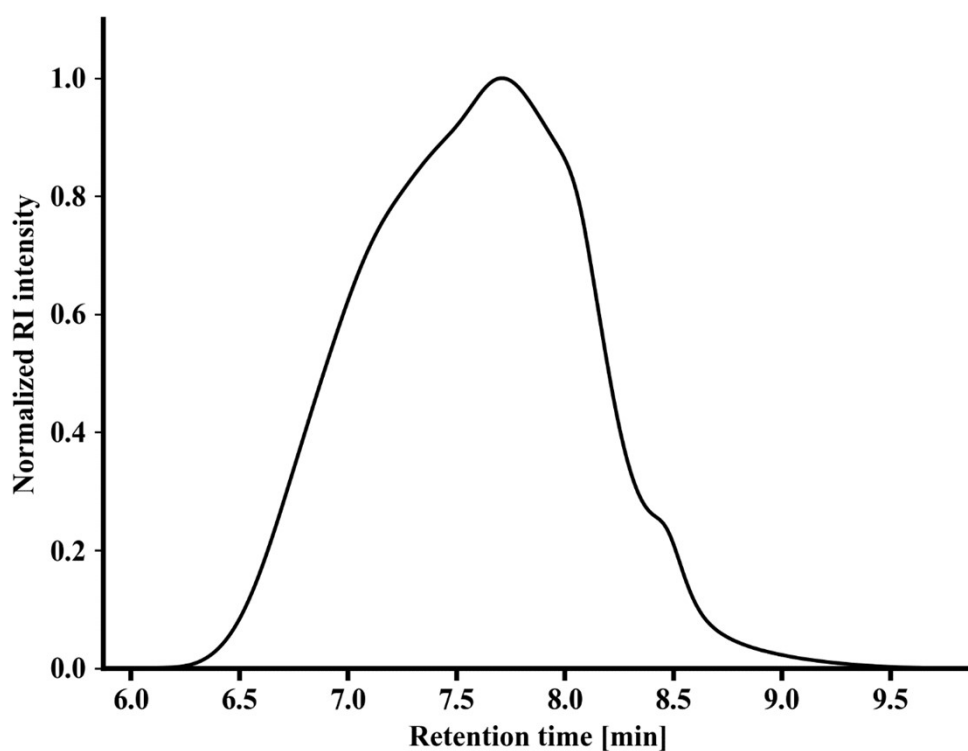

**Figure S46.** SEC-curve of polymer **P10** (chloroform/isopropanol/triethylamine [94/2/4], PMMA-standard).

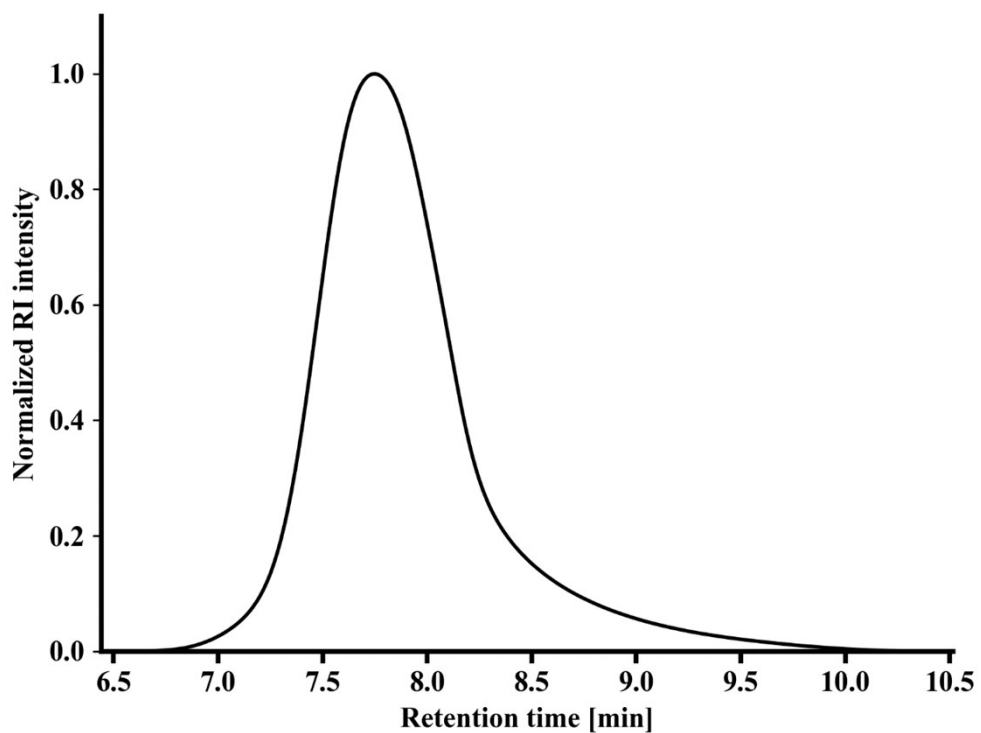

**Figure S47.** SEC-curve of polymer **P11** (chloroform/isopropanol/triethylamine [94/2/4], PS-standard).

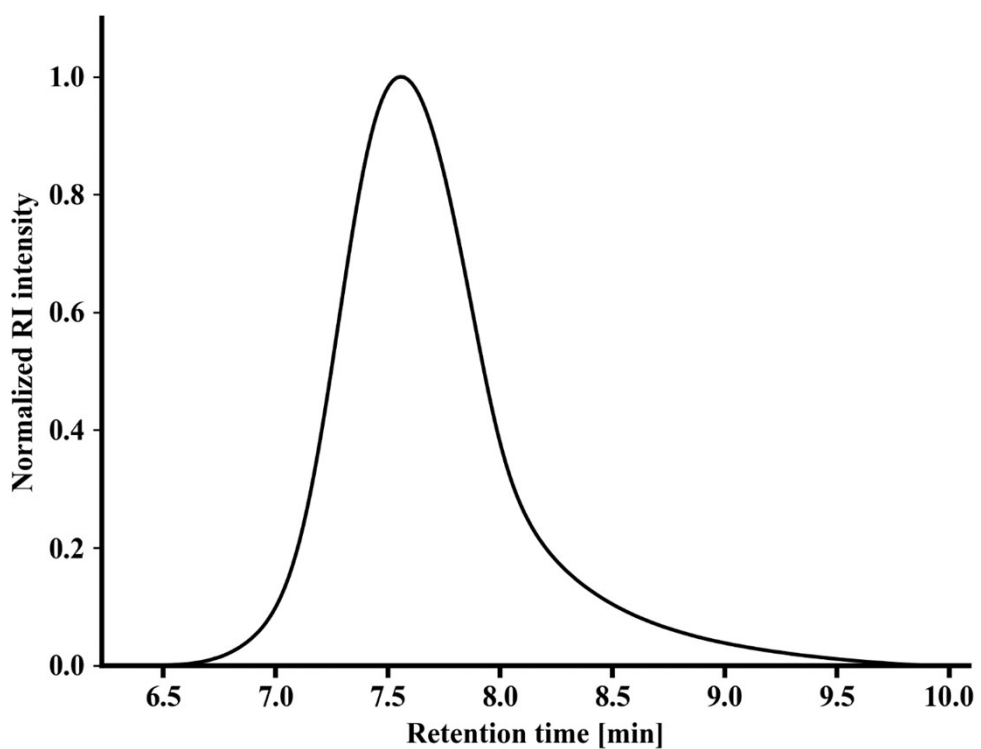

**Figure S48.** SEC-curve of polymer **P12** (chloroform/isopropanol/triethylamine [94/2/4], PS-standard).

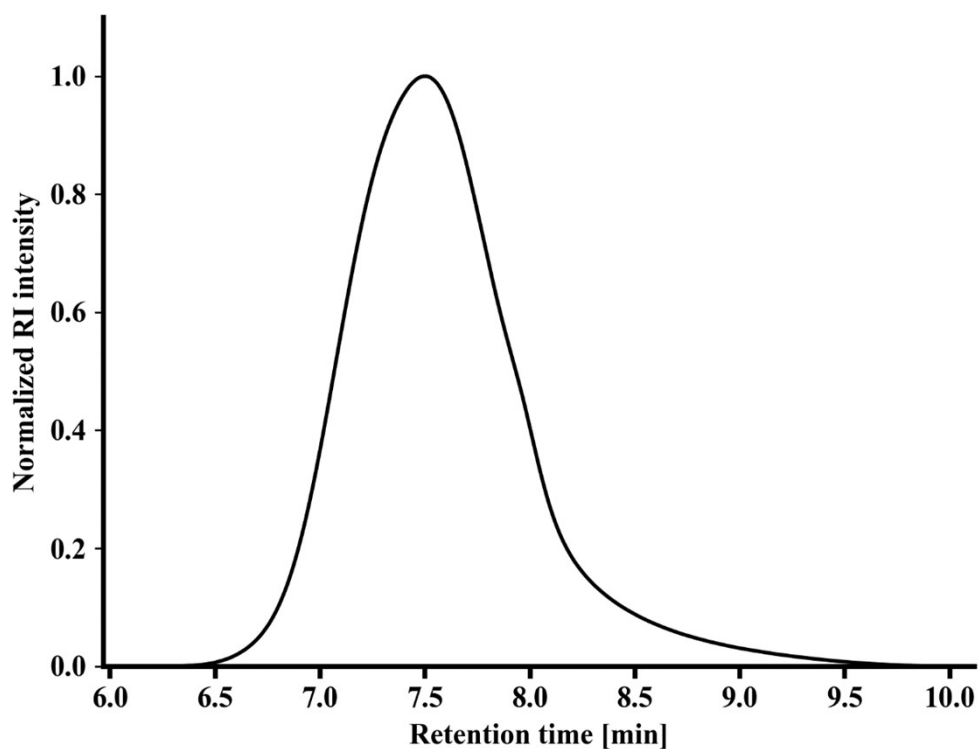

**Figure S49.** SEC-curve of polymer **P13** (chloroform/isopropanol/triethylamine [94/2/4], PMMA-standard).

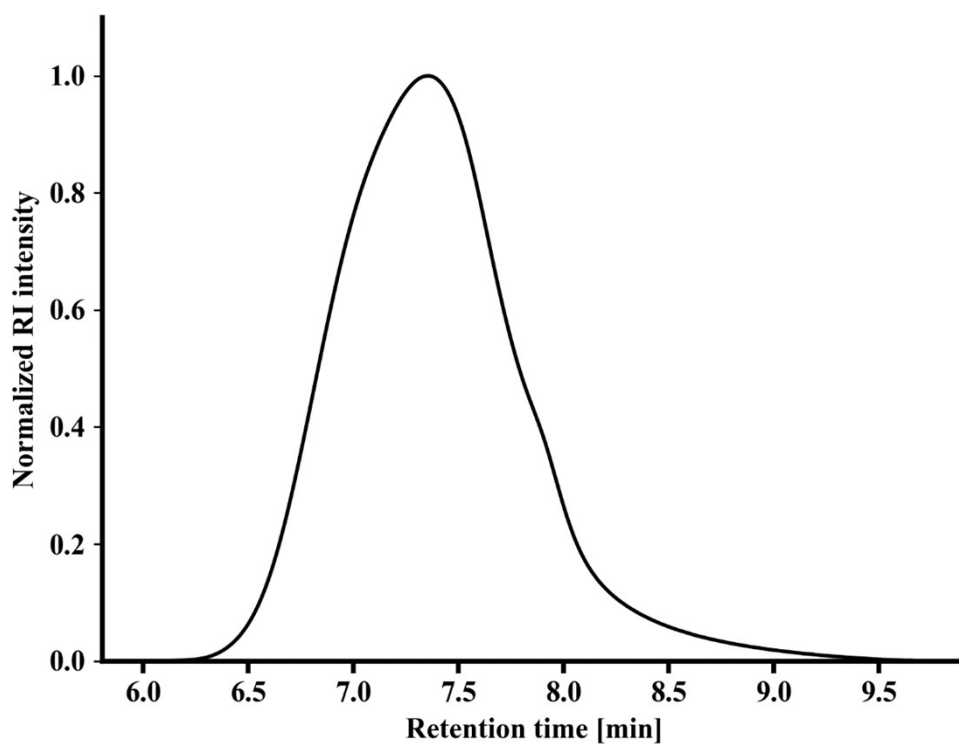

**Figure S50.** SEC-curve of polymer **P14** (chloroform/isopropanol/triethylamine [94/2/4], PMMA-standard).

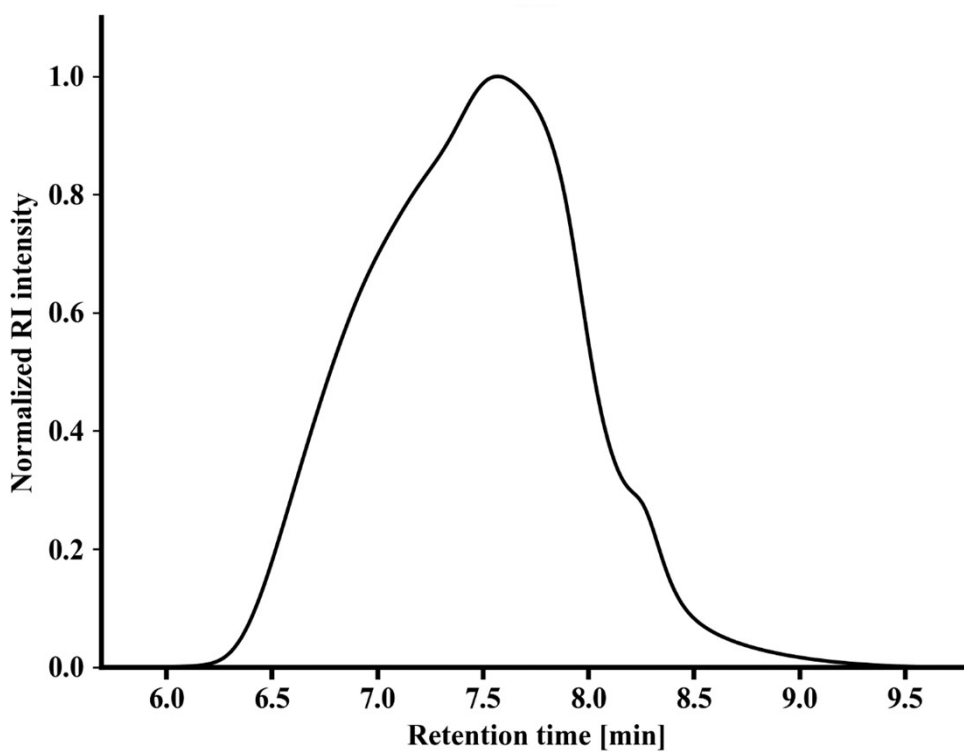

**Figure S51.** SEC-curve of polymer **P15** (chloroform/isopropanol/triethylamine [94/2/4], PMMA-standard).

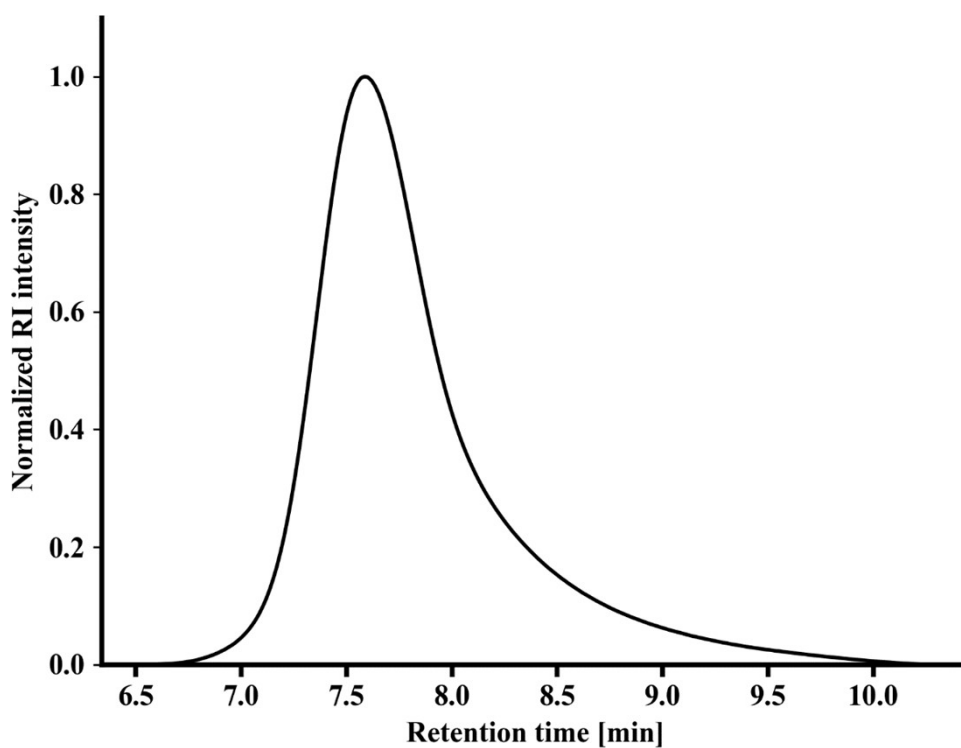

**Figure S52.** SEC-curve of polymer **P16** (chloroform/isopropanol/triethylamine [94/2/4], PS-standard).

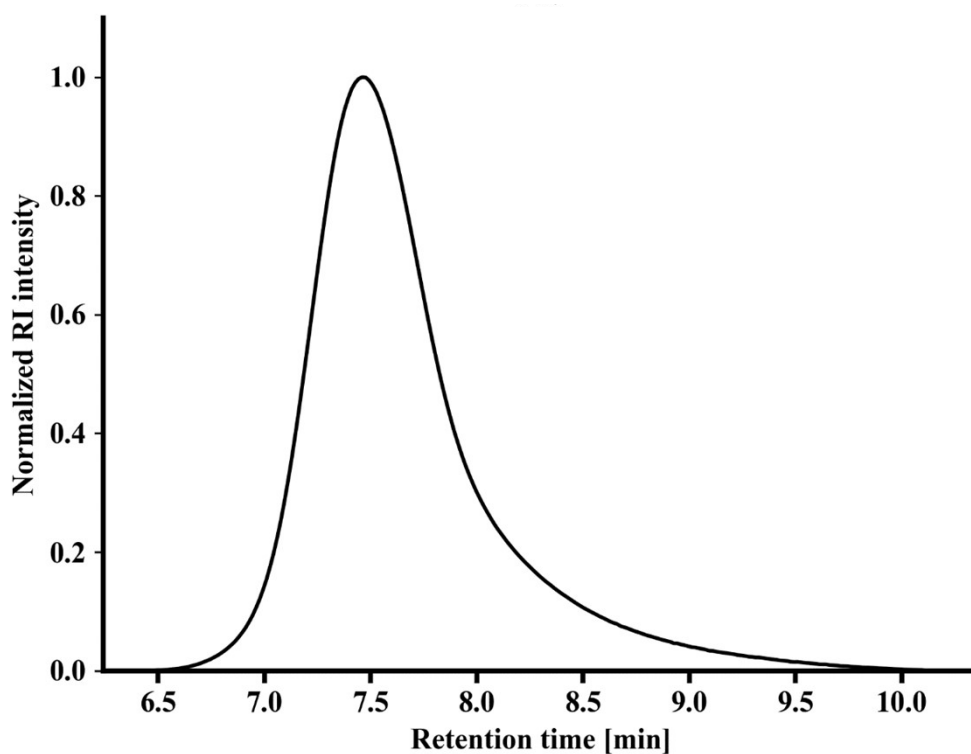

**Figure S53.** SEC-curve of polymer **P17** (chloroform/isopropanol/triethylamine [94/2/4], PS-standard).

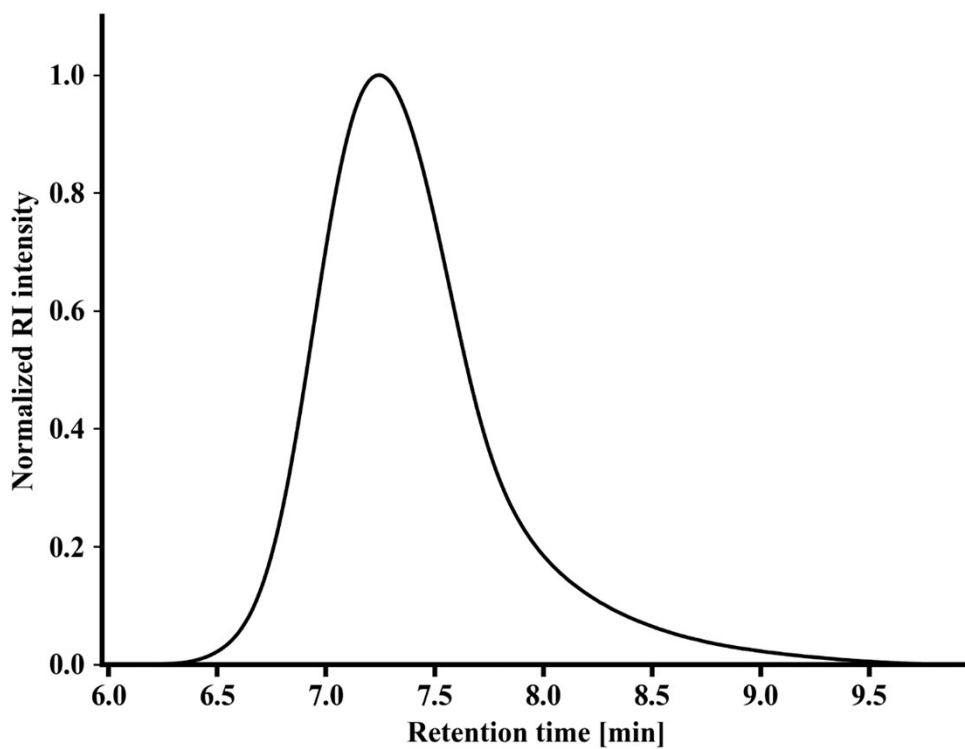

**Figure S54.** SEC-curve of polymer **P18** (chloroform/isopropanol/triethylamine [94/2/4], PMMA-standard).

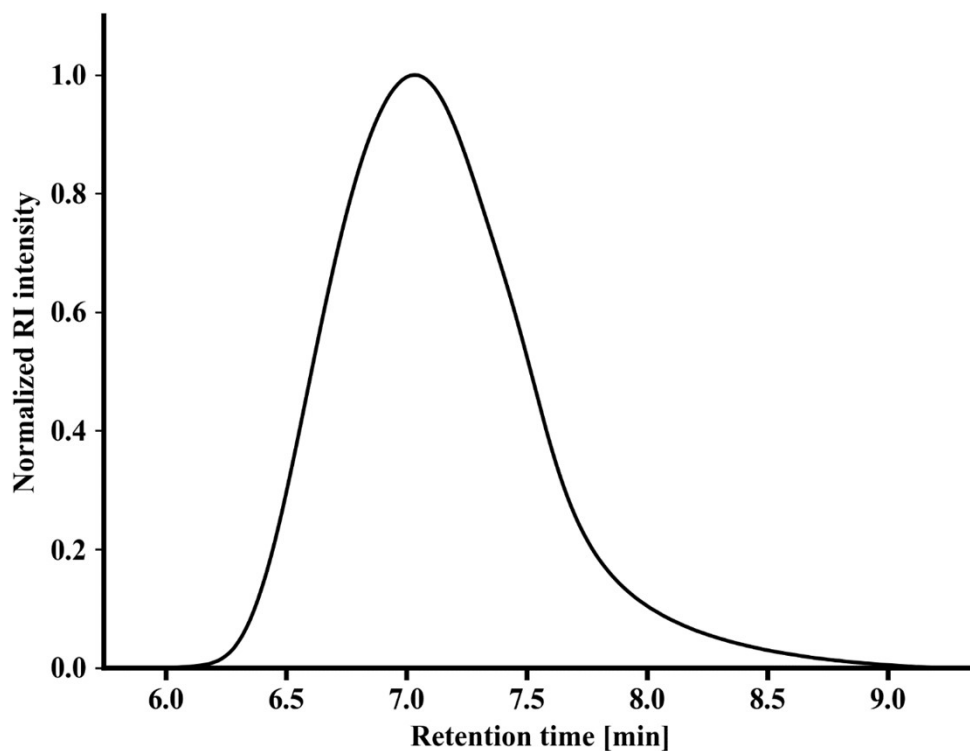

**Figure S55.** SEC-curve of polymer **P19** (chloroform/isopropanol/triethylamine [94/2/4], PMMA-standard).

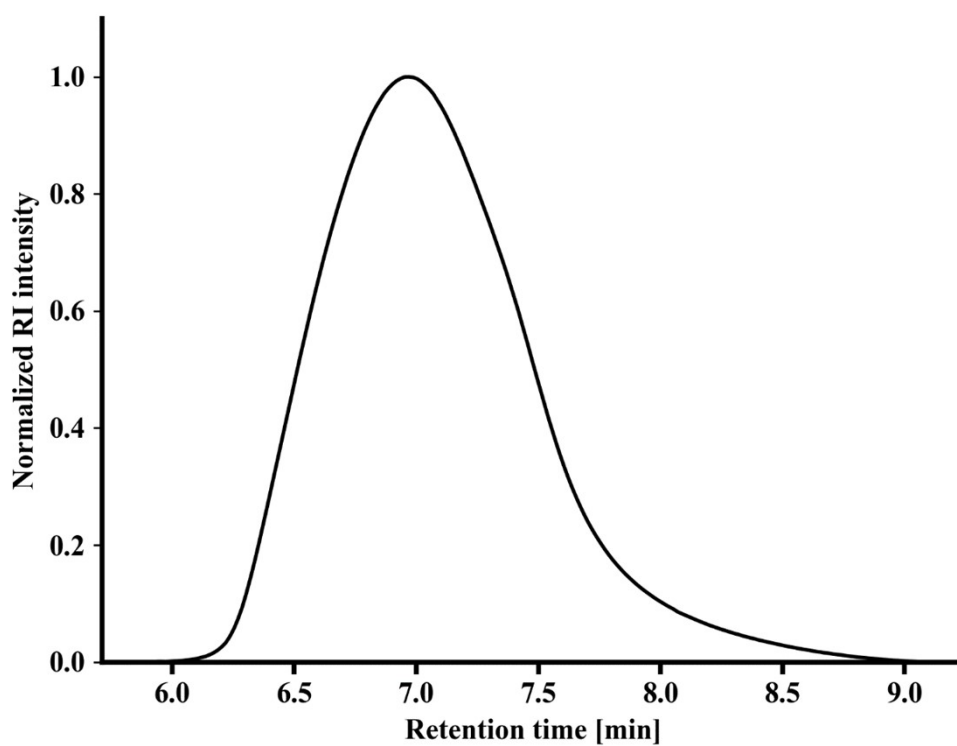

**Figure S56.** SEC-curve of polymer **P20** (chloroform/isopropanol/triethylamine [94/2/4], PMMA-standard).

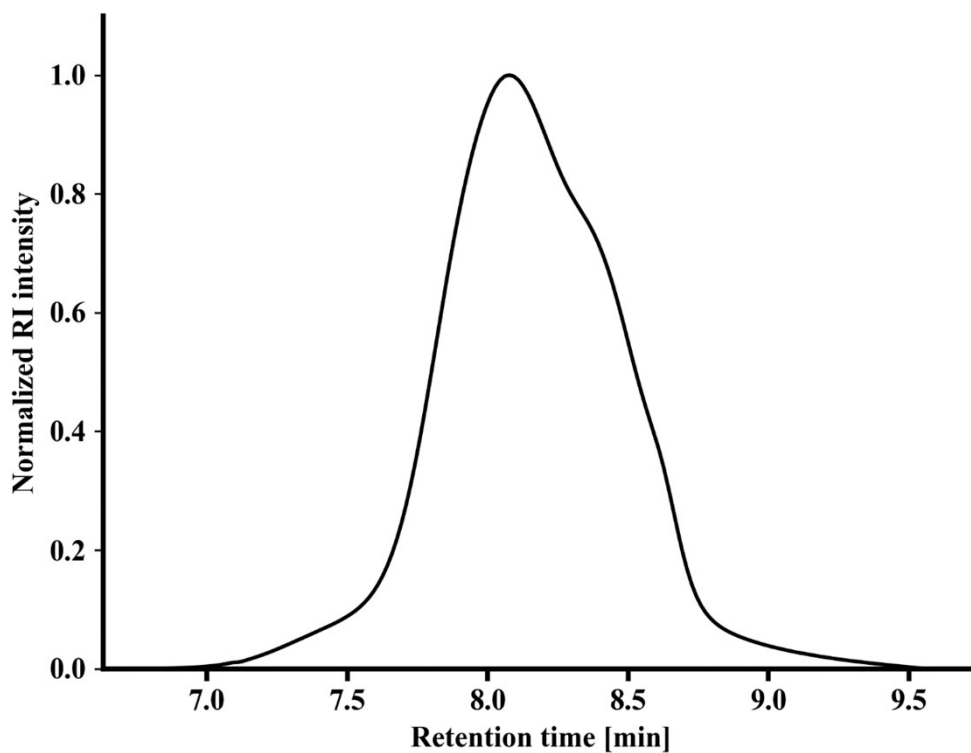

**Figure S57.** SEC-curve of polymer U1 (chloroform/isopropanol/triethylamine [94/2/4], PS-standard).

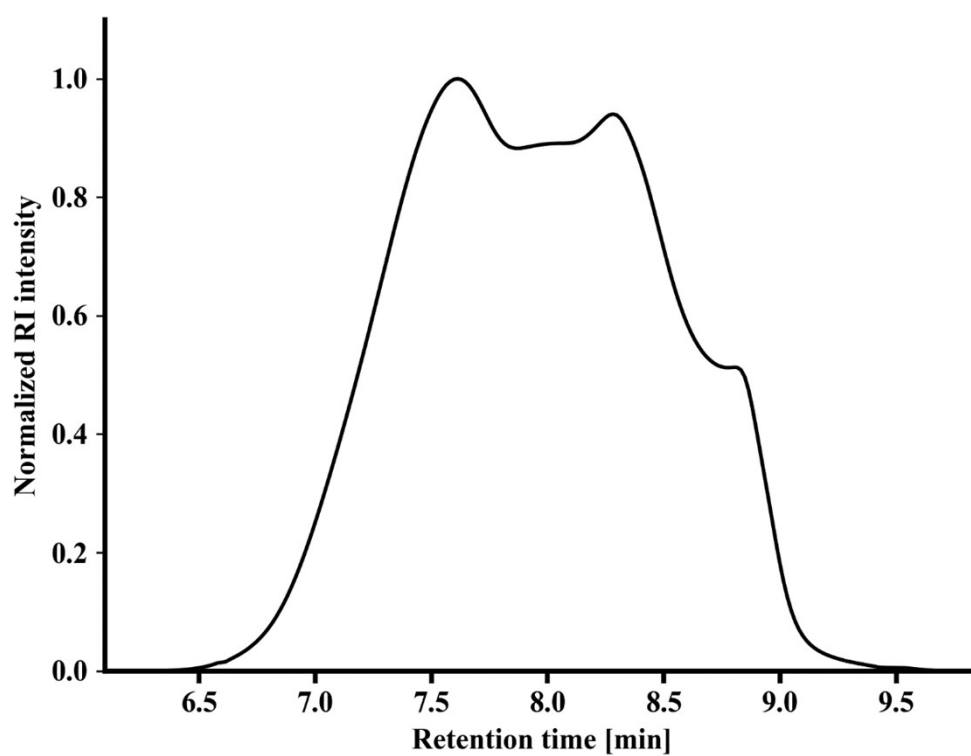

**Figure S58.** SEC-curve of polymer U2 (chloroform/isopropanol/triethylamine [94/2/4], PMMA-standard).

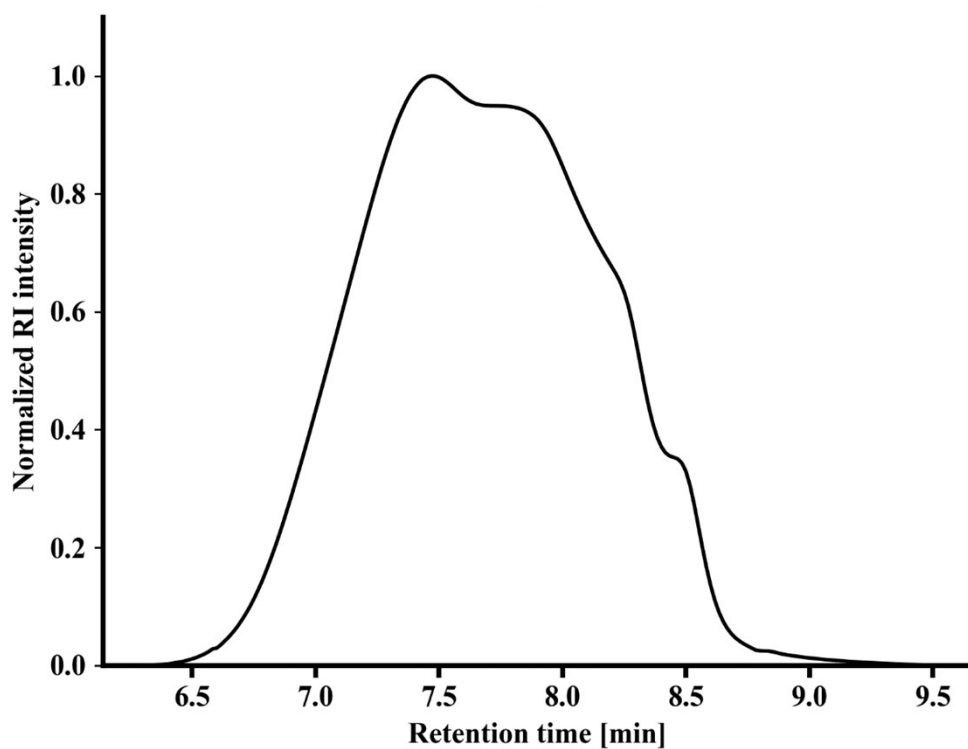

**Figure S59.** SEC-curve of polymer U3 (chloroform/isopropanol/triethylamine [94/2/4], PMMA-standard).

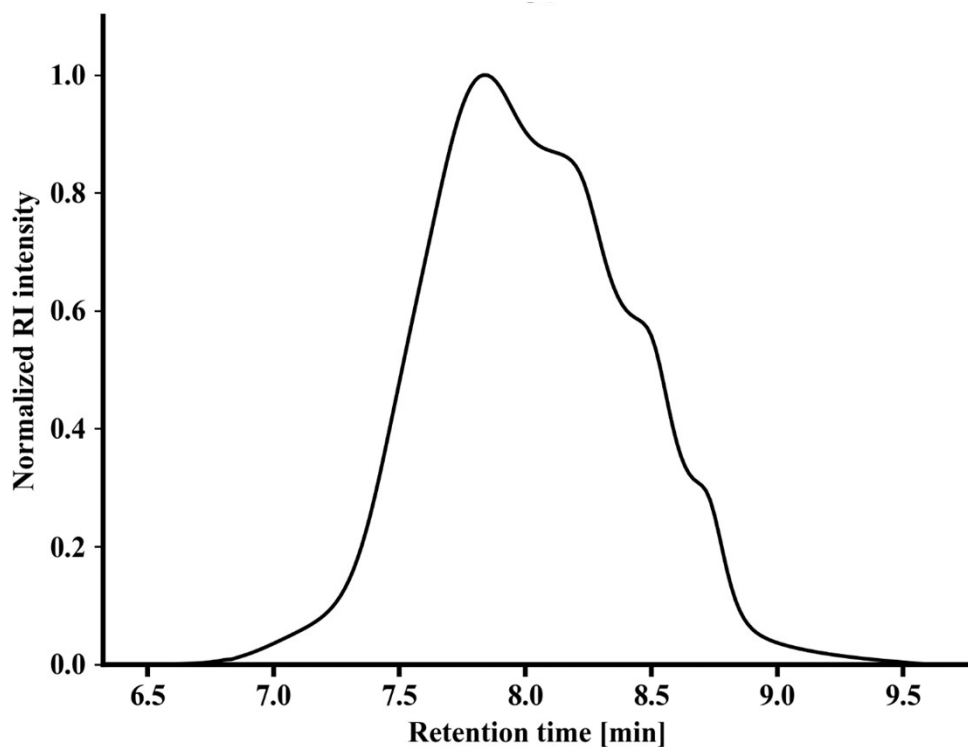

**Figure S60** SEC-curve of polymer U4 (chloroform/isopropanol/triethylamine [94/2/4], PS-standard).



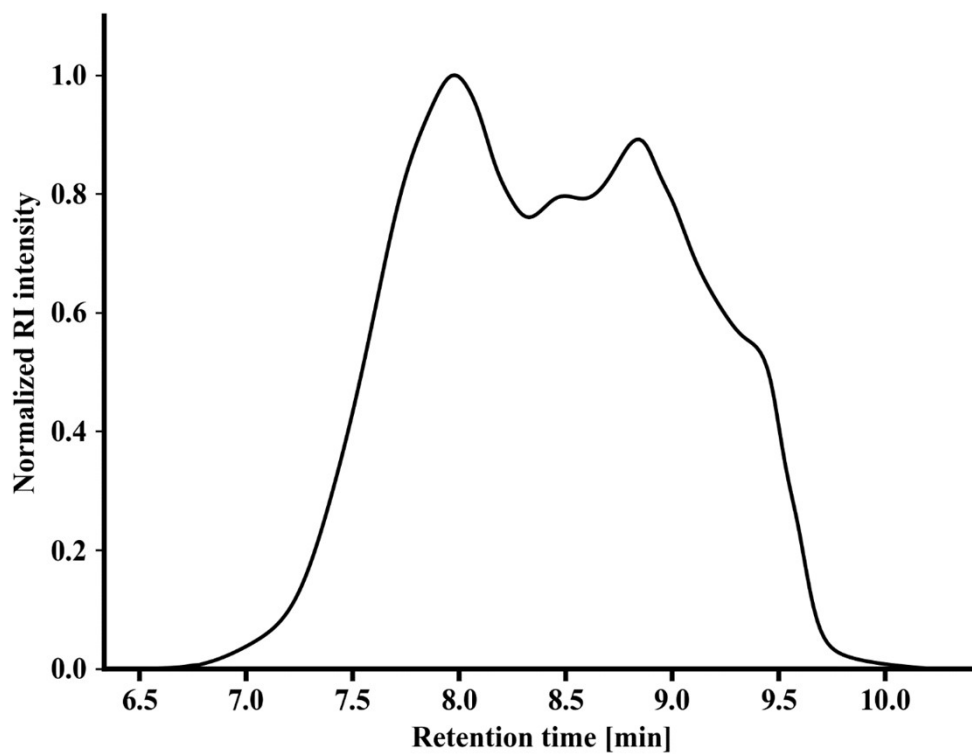

**Figure S61.** SEC-curve of polymer U5 (chloroform/isopropanol/triethylamine [94/2/4], PS-standard).

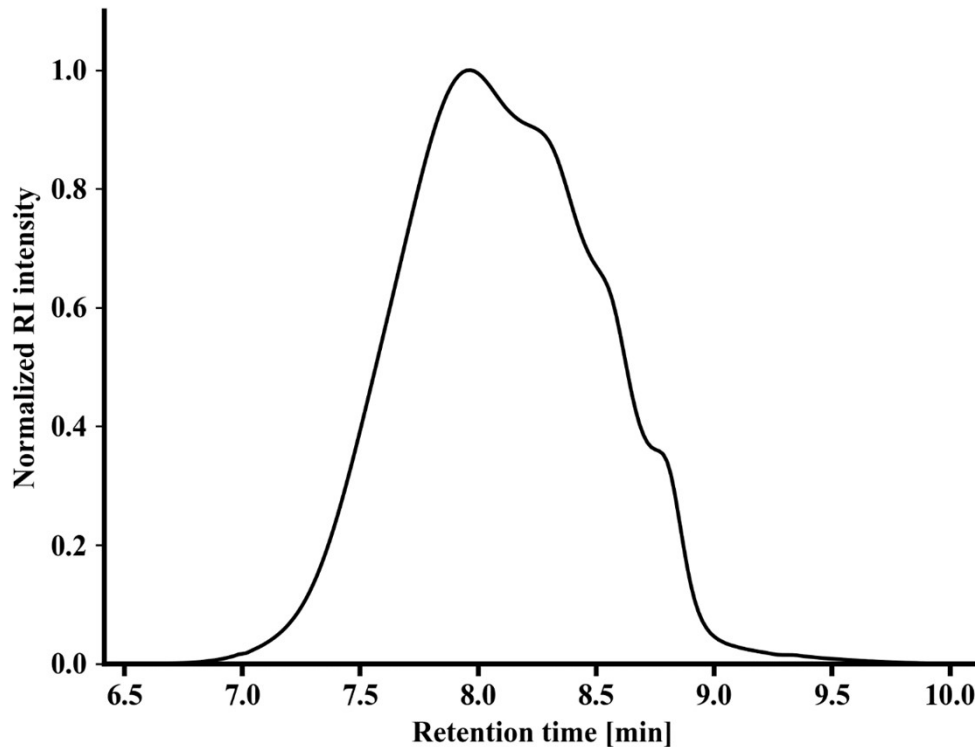

**Figure S62.** SEC-curve of polymer U6 (chloroform/isopropanol/triethylamine [94/2/4], PMMA-standard).

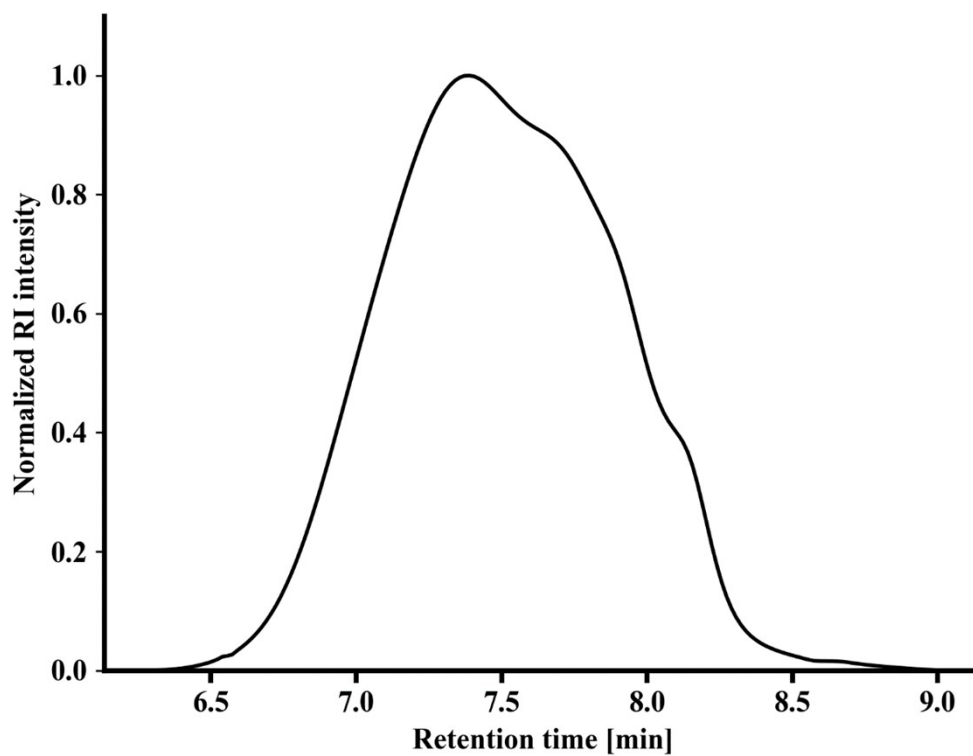

**Figure S63.** SEC-curve of polymer U7 (chloroform/isopropanol/triethylamine [94/2/4], PMMA-standard).

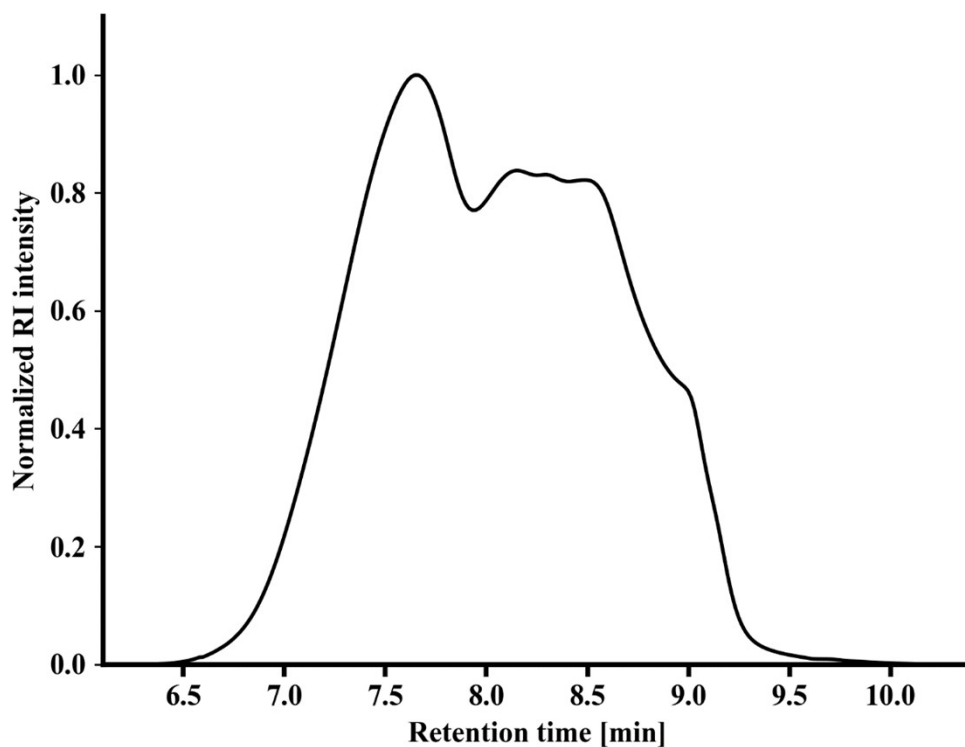

**Figure S64.** SEC-curve of polymer U8 (chloroform/isopropanol/triethylamine [94/2/4], PMMA-standard).

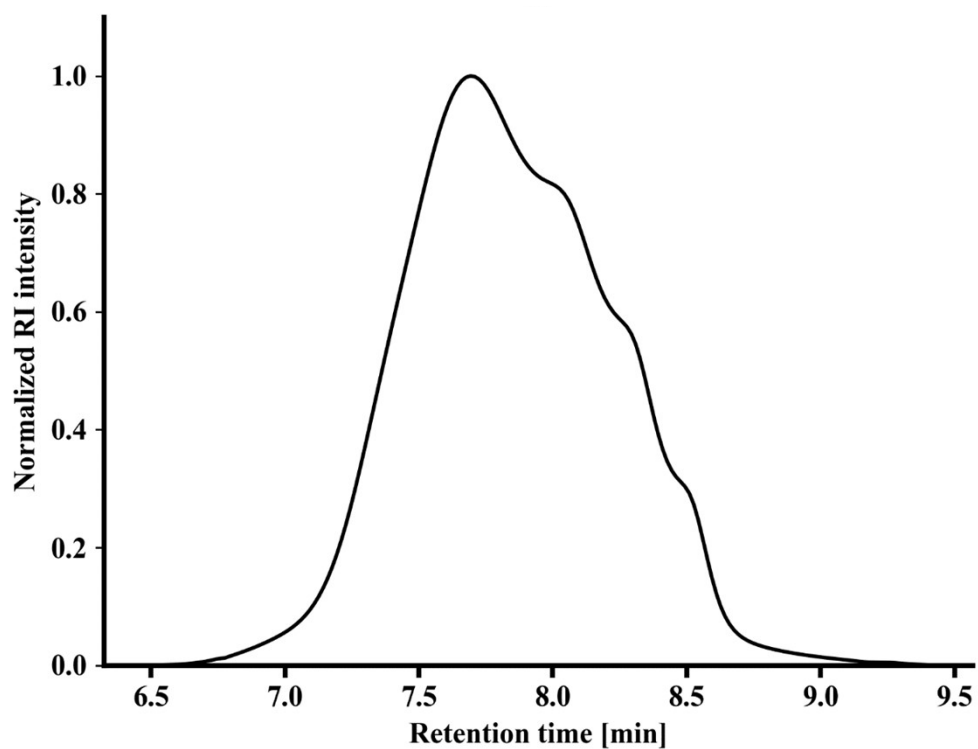

**Figure S65.** SEC-curve of polymer U9 (chloroform/isopropanol/triethylamine [94/2/4], PS-standard).

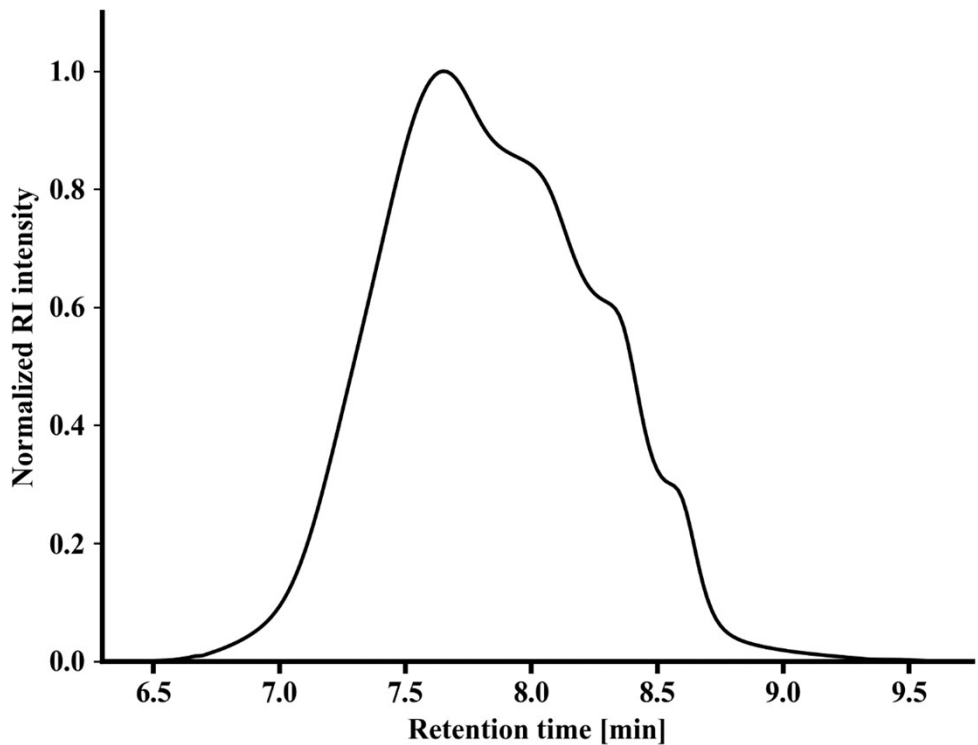

**Figure S66.** SEC-curve of polymer U10 (chloroform/isopropanol/triethylamine [94/2/4], PS-standard).

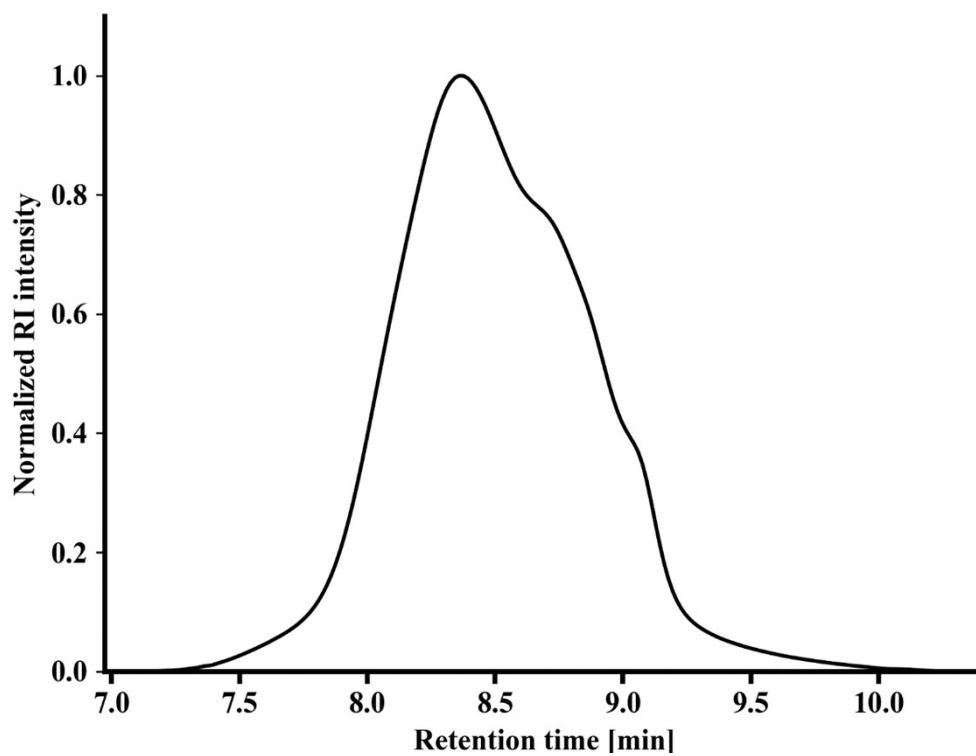

**Figure S67.** SEC-curve of polymer U11 (chloroform/isopropanol/triethylamine [94/2/4], PS-standard).

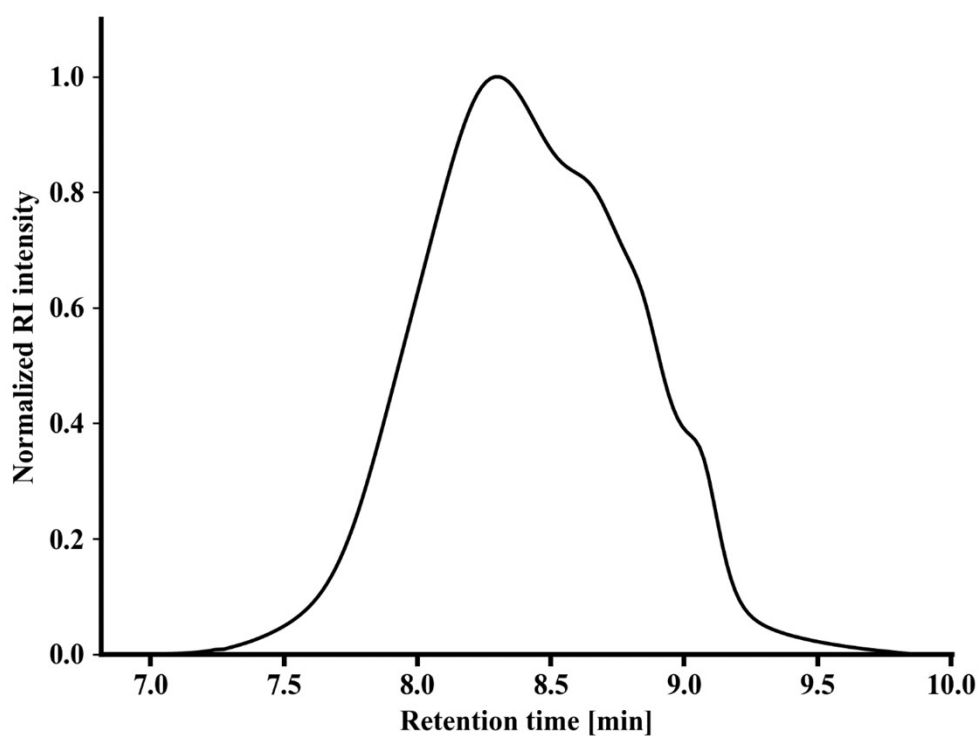

**Figure S68.** SEC-curve of polymer U12 (chloroform/isopropanol/triethylamine [94/2/4], PMMA-standard).

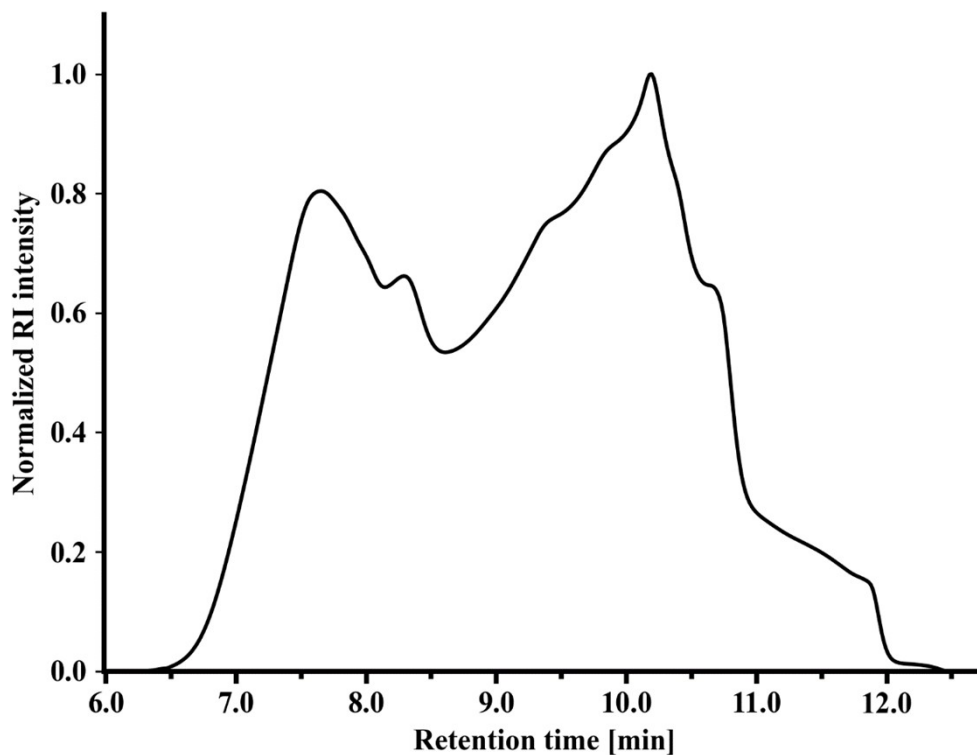

**Figure S69.** SEC-curve of polymer U13 (chloroform/isopropanol/triethylamine [94/2/4], PMMA-standard).

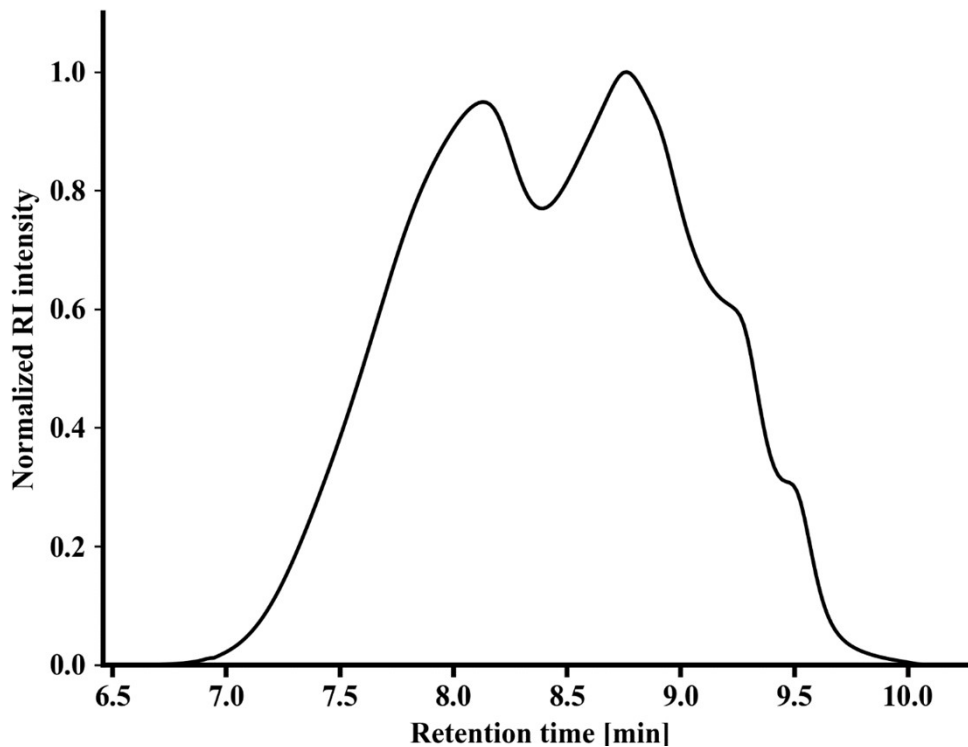

**Figure S70.** SEC-curve of polymer U14 (chloroform/isopropanol/triethylamine [94/2/4], PMMA-standard).

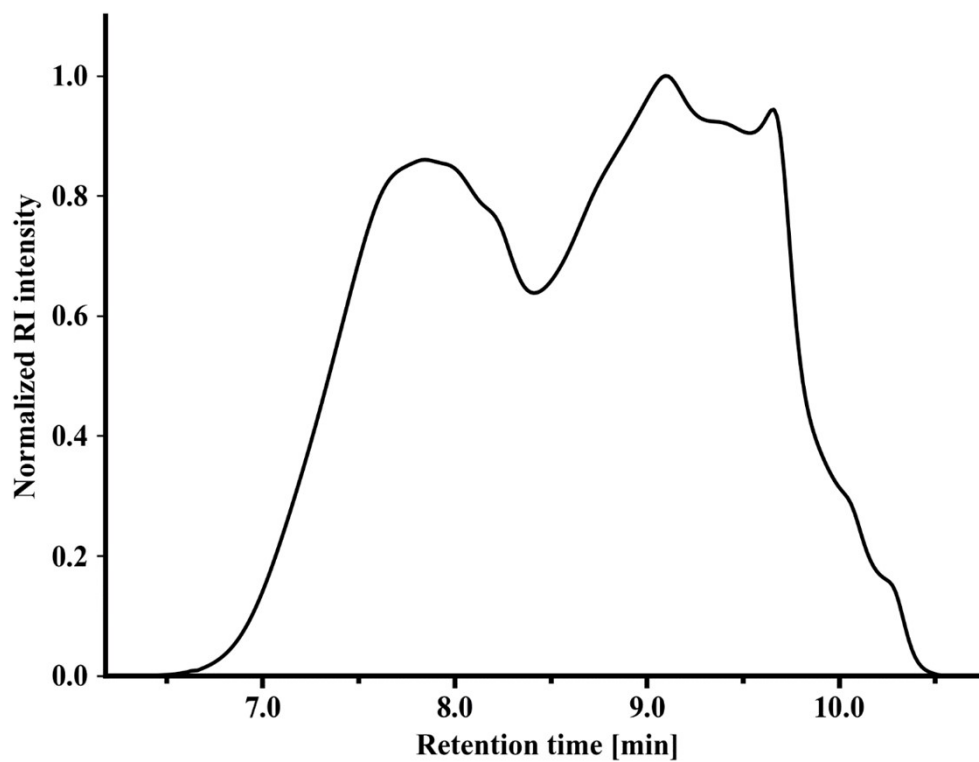

**Figure S71.** SEC-curve of polymer U15 (chloroform/isopropanol/triethylamine [94/2/4], PMMA-standard).

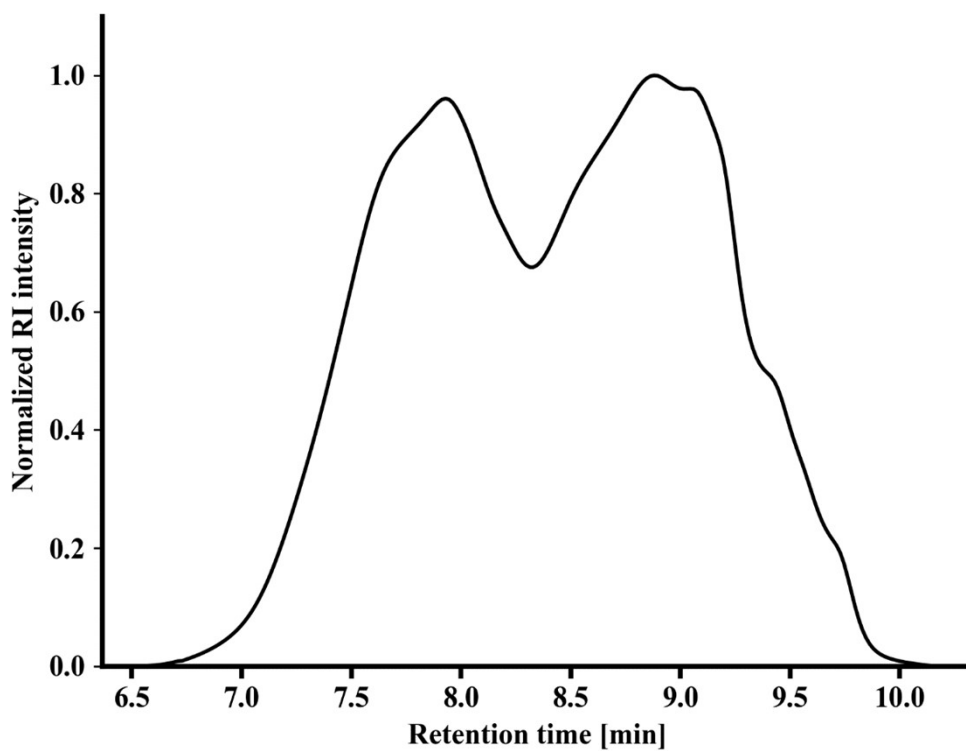

**Figure S72.** SEC-curve of polymer U16 (chloroform/isopropanol/triethylamine [94/2/4], PMMA-standard)
